1 TITLE:

2

3 Quantitative reverse transcription PCR assay to detect pyrethroid resistance in *Culex*  
4 mosquitoes

5

6 Authors: Kelli M. Hager <sup>1,2,6</sup>, Erick Gaona<sup>1</sup>, Amy Kistler <sup>3</sup>, Kalani Ratnasiri <sup>3</sup>, Hanna  
7 Retallack <sup>4</sup>, Miguel Barretto <sup>1</sup>, Sarah S. Wheeler <sup>6</sup>, Christopher M. Hoover <sup>2</sup>  
8 Eric J. Haas-Stapleton <sup>1\*</sup>

9

10 Affiliations:

11 <sup>1</sup> Alameda County Mosquito Abatement District, Hayward, CA 94545

12 <sup>2</sup> University of California, Berkeley, School of Public Health, Berkeley, CA 94720

13 <sup>3</sup> Chan Zuckerberg Biohub, San Francisco, CA 94158

14 <sup>4</sup> University of California, San Francisco, CA 94158

15 <sup>5</sup> Sacramento-Yolo County Mosquito and Vector Control District, Elk Grove, CA 95624

16 <sup>6</sup> Currently: New York State Department of Public Health, Wadsworth Center, Empire  
17 State Plaza, Albany, NY 12237

18

19 \*Corresponding author: [Eric.Haas@mosquitoes.org](mailto:Eric.Haas@mosquitoes.org)

20

21

22

23 Key words: *Culex*, kdr, pyrethroid resistance, assay

24 **Abstract**

25 Pyrethroid insecticides are widely used to control mosquitoes that transmit diseases  
26 such as West Nile virus (WNV) to humans. A single nucleotide polymorphism (SNP) in  
27 the knockdown resistance locus (*kdr*) of the *voltage gated sodium channel* (*Vgsc*) gene  
28 of *Culex* mosquitoes confers knockdown resistance to pyrethroids. PCR-based assays  
29 that detect these SNPs in *Culex* species are currently available for *Culex pipiens*  
30 Linnaeus and *Culex quinquefasciatus* Say. RNAseq was employed to sequence the  
31 coding region of *Vgsc* for *Culex tarsalis* Coquillett and *Culex erythrothorax* Dyar, two  
32 WNV vectors. We utilized the cDNA sequence to develop a quantitative reverse  
33 transcriptase PCR assay that detects the L1014F mutation in the *kdr* of *Vgsc*. Because  
34 this locus is conserved, the assay successfully detected the SNPs in multiple *Culex spp.*  
35 vectors of WNV in the United States. The resulting *Culex RTkdr* assay was validated  
36 using quantitative PCR, CDC bottle bioassays, and sequencing of PCR products. Using  
37 sequencing, we determined the accuracy of the *Culex RTkdr* assay was 99%.  
38 Pyrethroid resistance was more common among *Cx. pipiens* than other *Culex spp.* and  
39 co-occurred with agriculture. We anticipate that public health and vector control agencies  
40 may utilize the *Culex RTkdr* assay to map the distribution of pyrethroid resistance in  
41 *Culex* species to more efficiently control mosquitoes and the diseases they transmit.

42

43

44

45

46

## 47 **Introduction**

48

49 Many mosquitoes within the *Culex* genus that are present in California are vectors for  
50 diseases caused by West Nile virus (WNV), St. Louis Encephalitis virus (SLEV), and  
51 filarial worms [1]. WNV and SLEV are maintained in a bird-mosquito cycle by  
52 mosquitoes such as *Culex pipiens* Linnaeus and *Culex erythrothorax* Dyar that  
53 preferentially feed on birds. *Culex tarsalis* Coquillett, another WNV vector, transition  
54 seasonally from ornithophilic to general feeders or when host availability is constrained  
55 [2, 3]. Humans and horses are considered dead-end hosts for these arboviruses  
56 because they generate low viremia, thereby preventing onward transmission of these  
57 arboviruses [4, 5]. There have been over 6,700 symptomatic human infections of WNV  
58 since it was introduced to California in 2003 [6, 7]. Vector control agencies interrupt  
59 disease transmission through environmental manipulation, biological or chemical control  
60 of adult and juvenile mosquitoes, and public education. Adulticides (pesticides that  
61 target biting adult mosquitoes) are used to reduce mosquito abundance and the  
62 transmission of pathogens.

63

64 Pyrethroid adulticides preferentially bind to open voltage gated sodium channels (*Vgsc*)  
65 in neuronal membranes, preventing their closure. The open *Vgsc* leaves the membrane  
66 depolarized and the neuron unable to transmit signals among cells, resulting in  
67 paralysis (i.e. knockdown) and death of the insect [8, 9]. More than 50 mutations in the  
68 sodium channel gene are associated with pyrethroid resistance among arthropods [10].

69 The most common among *Culex* species is the L1014F single nucleotide polymorphism  
70 (SNP), which promotes closed state inactivation and knockdown resistance [11, 12].

71

72 Pyrethroids are commonly used to control structural and agricultural arthropod pests.

73 The CDC considers mosquito populations resistant to an adulticide when knockdown or  
74 mortality rates are less than 80% in an adult mosquito bottle bioassay (BBA; [13]).

75 Increased use of pyrethroids in agricultural settings may contribute to pyrethroid  
76 resistance among a broad range of arthropods [14] [15]. Concerns with widespread  
77 pyrethroid resistance in mosquitoes prompted us to develop a quantitative reverse  
78 transcriptase-PCR (qRT-PCR) assay that detects the L1014F SNP in *Culex* species.

79 Our original goal was to develop this assay for use in *Culex tarsalis*, but after comparing  
80 the cDNA sequences of other *Culex* vectors we discovered the qRT-PCR assay  
81 produced a more conserved template compared to its qPCR counterparts. Here we  
82 describe the development of a *Culex RTkdr* assay and an application of the assay to  
83 map pyrethroid resistance within Alameda County (California, USA).

84

## 85 **Methods**

86

### 87 *1. Mosquito Collection*

88

89 Adult mosquitoes used for *RTkdr* testing were collected overnight from May - October of  
90 2019 in Alameda County (California, USA) using Encephalitis Vector Survey traps  
91 (BioQuip, Rancho Dominguez, CA) that were baited with dry ice. A scientific collection

92 permit was not required because the collections were made by a mosquito abatement  
93 district that was operating under the legislative authority of the California Health and  
94 Safety Code § 2040. The field studies did not involve endangered or protected species.

95  
96 Collected mosquitoes were identified to species using a dissection microscope and chill  
97 table (BioQuip, Rancho Dominguez, CA). Individual whole mosquitoes were placed into  
98 2 ml microcentrifuge bead mill tubes that contained 2.8 mm ceramic beads (Fisher  
99 Scientific, Waltham, MA) and frozen at -20°C until use. Susceptible *Cx. tarsalis* utilized  
100 in insecticide CDC bottle bioassays described below were from the Kern National  
101 Wildlife Refuge (KNWR) colony [16, 17] and resistant *Cx. tarsalis* maintained in an  
102 insectary that were originally collected during 2019 in Woodland, California USA  
103 (Conaway strain; GPS coordinates: 38.647287, -121.668173). These strains were also  
104 used in the *Culex* RT*kdr* assay as controls for susceptible (wildtype KNWR strain) or  
105 resistant (mutant Conaway strain) *Cx. tarsalis*.

106

## 107 2. RNA Extraction

108

109 Individual whole mosquitoes were homogenized in 200 µl of MagMAX Lysis/Binding  
110 Buffer that was diluted 1:2 in phosphate buffer saline for 45 s using a Fisherbrand Bead  
111 Mill 24 Homogenizer (Thermo Fisher Scientific, Waltham, MA). RNA was extracted  
112 using the MagMAX-96 Viral RNA Isolation Kit and KingFisher Duo Prime Purification  
113 System programmed with the MagMAX Pathogen Standard Volume software protocol as  
114 described by the manufacturer (Thermo Fisher Scientific, Waltham, MA) with the

115 following exceptions: 80 µl of homogenate was extracted, magnetic beads were washed  
116 with 250 µl of wash solution, and the RNA was eluted in 50 µl. Notably, we employed  
117 the same method to extract RNA from mosquitoes that is widely used when testing for  
118 the presence of arboviruses [18]. Alternatively, RNeasy Plus Mini Kits (Qiagen,  
119 Mississauga, Ontario, Canada) were used to extract RNA from mosquitoes, as  
120 recommended by the manufacturer (Qiagen, Mississauga, Ontario, Canada). RNA  
121 concentration in the samples was measured using a NanoDrop 2000  
122 Spectrophotometer (ThermoFisher Scientific, Waltham, MA) according the manufacturer  
123 recommendations.

124

### 125 3. RNAseq of *Vgsc* gene

126

127 *Vgsc* sequences were recovered from the host fraction of a metatranscriptomic RNAseq  
128 dataset derived from total RNA extracted from *Cx. erythrothorax* (N = 44) and *Cx.*  
129 *tarsalis* (N = 26) single mosquitoes collected from across California [19]. Sample  
130 collection, total RNA extraction, and paired-end mNGS RNAseq from each of the single  
131 mosquito specimens that served as input data here are described elsewhere ([19];  
132 Sequence related archive: <https://www.ncbi.nlm.nih.gov/sra/PRJNA605178>). Raw fastq  
133 R1 and R2 data from each mosquito were first compressed to a unique set of reads  
134 sharing < 95% sequence identity via CD-HIT software [20, 21]. Translated blastx  
135 alignment of the resulting R1 and R2 reads with a representative *Vgsc* protein sequence  
136 from *Culex quinquefasciatus* Say (NCBI protein accession AFW98419.1; [22] was  
137 applied to identify deduplicated R1 and R2 reads from each mosquito sample which

138 showed  $\geq 50\%$  of their length aligned with  $\geq 90\%$  identity to the *Cx. quinquefasciatus*  
139 *Vgsc* reference sequence. Seqtk software (<https://github.com/lh3/seqtk>) was used to  
140 compile the separate *Culex erythrothorax* and *Cx. tarsalis* fastq reads that met these  
141 criteria from the 44 *Cx. erythrothorax* or 26 *Cx. tarsalis* individually deduplicated  
142 datasets. Partners of unpaired reads included in each pool were identified and included  
143 to ensure a full complement of paired reads, including additional potentially divergent  
144 *Vgsc* sequences that were not captured in the alignment step.

145  
146 A total of 410 *Culex tarsalis* input read pairs and 481 *Culex erythrothorax* read pairs  
147 were carried forward from this step. Trimmomatic software [23] was used to remove the  
148 Sequencing library adapter sequences, along with low quality terminal bases of the  
149 reads. The resulting paired-end pooled datasets were each then separately used as  
150 input for SPAdes [24] paired-end *de novo* assembly of *Vgsc* transcripts. To facilitate  
151 *Vgsc* contig coverage analysis, read pools were aligned back to each of the identified  
152 *Vgsc* contigs via Bowtie2 [25].

153  
154 The *Cx. tarsalis* and *Cx. erythrothorax* contig assemblies were aligned to the NCBI nt  
155 and nr databases via blastn and blastx, respectively, to identify the set of *de novo*  
156 assembled contigs that corresponded to *Vgsc* transcripts. A single 6878 bp *Cx. tarsalis*  
157 contig and two 6364 bp and 506 bp *Cx. erythrothorax* contigs were identified for further  
158 analyses. The *Cx. tarsalis* 6878bp contig encompasses an uninterrupted 2113 amino  
159 acid open reading frame, with additional 5' 321 bp and 3' 218 bp flanking terminal  
160 sequences.

161  
162 The most closely related sequences in NCBI to this contig corresponded to several  
163 *Culex* complete *Vgsc* nucleotide and protein coding sequences. The best match was  
164 the *Cx. pipiens pallens* strain SS sodium channel mRNA (NCBI accession numbers  
165 KY171978.1 and ARO72116.1), showing  $\geq 95\%$  overall sequence identity at both the  
166 nucleotide and amino acid level. The *Cx. erythrothorax* contigs were not joined in the  
167 initial de novo assembly; however, the blastn and blastx alignment termini indicated a  
168 short ( $< 10$  bp) region of overlapping sequence at the ends of these 2 contigs. Manual  
169 joining of these 2 contigs generated a 6709 bp contig that encodes an uninterrupted  
170 open reading frame of 2109 amino acids, and additional flanking 283 bp of 5'utr and 99  
171 bp of 3'utr sequences. The best match is the *Cx. quinquefasciatus* isolate S-Lab  
172 sodium channel mRNA, complete cds (NCBI accession numbers EU817515.1 and  
173 ARO72116.1), showing  $\geq 95\%$  overall sequence identity at both the nucleotide and  
174 amino acid level. Accession numbers for the recovered *Cx. erythrothorax* and *Cx.*  
175 *tarsalis* *Vgsc* transcript sequences are MW176091 and MW176090, respectively.  
176 Resulting assemblies were manually reviewed via Geneious software (version 2019.0.4;  
177 <https://www.geneious.com/>) to generate final contig consensus sequences.

178

#### 179 *4. Detection of kdr SNP by RT-PCR*

180

181 The primer and probe sequences to detect the *kdr* SNP were designed using  
182 Primer3Plus software (Table 1; [26]) based on the cDNA of *Vgsc* from *Cx. tarsalis* and  
183 *Cx. erythrothorax* (GenBank No. MW176090 and MW176091, respectively). Wildtype



184 and mutant probes were labeled with fluorescein (FAM) and hexachlorofluorescein  
185 (HEX), respectively (Integrated DNA Technologies, Coralville, Iowa). A diagram  
186 depicting primer and probe locations, the 1014 mutation and intron site for *Vgsc* of *Cx.*  
187 *tarsalis* is provided in Figure 1. Nucleotide sequences were aligned using Basic Local  
188 Alignment Search Tool [27].

189

190 Table 1. Primers and probes used in the *Culex RTkdr* assay. Red text indicates the  
191 location of the *kdr* SNP.

| Name           | Sequence (5' → 3')                                       |
|----------------|----------------------------------------------------------|
| <b>Primers</b> |                                                          |
| RTSeq_Fwd      | ATCTGACGTTTGTGCTCTGC                                     |
| RTkdr_Fwd      | CCTGCATTCCGTTCTTCTTG                                     |
| RTkdr_Rev      | GCGATCTTGTTTCGTTTCGTT                                    |
| <b>Probes</b>  |                                                          |
| RTkdr_WT       | FAM-<br>GGTTAAGTA/ZEN/CGACTAAGTTTCCTATCACTAC-<br>3IABkFQ |
| RTkdr_Mutant   | HEX-<br>GGTTAAGTA/ZEN/CGACAAGTTTCCTATCACTAC-<br>3IABkFQ  |

192

193 The Taqman Fast Virus 1-Step Master Mix (Thermo Fisher Scientific, Waltham, MA)

194 was prepared as described by the manufacturer using 1 µl of template RNA (48.8-144.8

195 ng/μl), primers diluted to 900 nM and probes diluted to 250 nM. PCR plates were  
196 vortexed for 10 s at the highest setting (Fisherbrand™ Analog Vortex Mixer,  
197 ThermoFisher Scientific, Waltham, MA), centrifuged for 15 seconds (MPS 1000 Mini  
198 PCR Plate Spinner, Labnet International, Inc., Edison, NJ) and subsequently analyzed  
199 with a QuantStudio™ 5 Real-Time PCR System (Thermo Fisher Scientific, Waltham,  
200 MA) using the Genotyping setting which assigns sample results based on a proprietary  
201 algorithm. Amplification curves were reviewed manually to ensure algorithm accuracy.  
202 RT-qPCR cycling conditions were as follows: 50°C for 5 minutes, 95°C for 20 seconds,  
203 followed by 40 cycles of 95°C for 3 seconds and 60°C for 30 seconds. Primer and probe  
204 concentration and PCR cycling conditions were optimized to discriminate homozygous  
205 and heterozygous genotypes. Allele controls were added in the form of a no template  
206 control and a known susceptible control for *Cx. tarsalis*, *Cx. pipiens* and *Cx.*  
207 *erythrothorax*. A known resistant control was also included for each of the former except  
208 *Cx. erythrothorax* because a resistant specimen of that species was not found in the  
209 current study.

210

## 211 5. Validation Methods

212

### 213 5.1 Insecticide Susceptibility Assays

214

215 CDC bottle bioassays were conducted to evaluate the resistance of adult mosquitoes to  
216 insecticides, according to CDC guidelines [13]. Three replicate bottles were evenly  
217 coated with 1 ml of technical grade insecticide (43 μg permethrin or 22 μg deltamethrin)

218 that was diluted in acetone. Control bottles contained only acetone diluent. The diluent  
219 was evaporated from the bottles in the dark at room temperature. Adult female  
220 mosquitoes were transferred to the bottles (14-23 mosquitoes per bottle), and the  
221 number of dead or knocked down mosquitoes was recorded at 15 min intervals for 180  
222 min. A mosquito was recorded as dead or knocked down if it could not stand unaided  
223 when the bottle was gently rotated; otherwise, the mosquito was counted as alive. Live  
224 and dead mosquitoes were separated, tested with the *Culex RTkdr* assay and the PCR  
225 products sequenced. Resistance ratios were calculated using the proportion of dead  
226 mosquitoes at the 45 min time point when average mortality was less than 100% with  
227 those from the susceptible Conway strain in the denominator.

228

229 *5.2 Validating the Culex RTkdr assay using Cx. pipiens quantitative PCR*  
230 *(qPCR) Taqman assay*

231

232 The *Cx. pipiens* quantitative PCR (qPCR) Taqman assay that was developed previously  
233 [28] was used to validate the *Culex RTkdr* assay using *Cx. pipiens* samples. We  
234 followed the protocol for Taqman Multiplex Master Mix (ThermoFisher Scientific,  
235 Waltham, MA) with the following exceptions: BSA was excluded and nucleic acid that  
236 was isolated with the MagMAX-96 Viral RNA Isolation Kit (described above) was used  
237 as the template. We evaluated 75 *Cx. pipiens* mosquitoes using both the Taqman qPCR  
238 and *Culex RTkdr* assay and results were compared. Discordant samples were  
239 evaluated by sequencing the PCR products.

240

241            *5.3 Sequencing of PCR Products*

242

243    PCR products were submitted to Elim Biopharmaceuticals (Hayward, CA) for PCR  
244    cleanup and sequencing. Because the RT*kdr*\_Fwd primer is in close proximity to the  
245    SNP, we designed a sequencing primer further upstream in the *Cx. tarsalis* mRNA  
246    sequence that produced a 373 bp PCR product (RTseq\_Fwd, Figure 1, Table 1).  
247    Primer, probe and template concentrations and PCR cycling conditions to generate  
248    PCR products for sequencing were as described above. Sequences were aligned to the  
249    *tarsalis Vgsc* mRNA sequence using MUSCLE [29] to locate the *kdr* SNP.  
250    Chromatograms were examined using 4Peaks software (Nucleobytes, Amsterdam, The  
251    Netherlands) to determine if heterozygosity was present at the SNP site.

252

253    *6. Analyzing the Geographic Distribution of the kdr SNP*

254

255    Tableau Software (Seattle, WA) was used to map the geographic distribution of the *kdr*  
256    SNP in mosquitoes that were collected in Alameda County (CA, USA). Allelic data for  
257    mosquitoes that were collected within 1 km of each other were combined. The trap sites  
258    were binned into two geographic regions, bayside and inland, that are separated by the  
259    San Francisco East Bay Hills, a natural boundary that limits movement of mosquitoes  
260    between the two regions. The distribution of allelic frequency was assessed by  
261    mosquito species and by geographical region (inland and bayside) within Alameda  
262    County. The resistant allele frequency,  $F_R$ , in each population was estimated (Equation

263 1) where  $2N_{RR}$  is the number of homozygous resistant mosquitoes,  $N_{RS}$  is the number of  
264 heterozygous resistant and  $N$  is the mosquito population size.

265

266 Equation 1. Equation for calculating resistance allele frequency

$$267 F_R = (2N_{RR} + N_{RS}) / 2N$$

268

269 Associations between genotype,  $Y$ , and mosquito species, region of collection, and area  
270 type surrounding the collection site were estimated using Equation 2 from an ordinal  
271 logistic regression model with ordered outcome categories (SS, RS, RR). The model  
272 was fit using the `polr` function from the MASS [30] package in R Software (version  
273 3.5.0;[31]) and used to estimate unadjusted and adjusted odds ratios for each variable.  
274 Figures were generated using `ggplot2` software [32].

275

276 Equation 2. Equation for ordinal logistic regression model

$$277 \text{Logit}(P(Y \leq j)) = \beta_{0j} - \beta_1 \text{Species} - \beta_2 \text{Region} - \beta_3 \text{AreaType}$$

278

## 279 **Results & Discussion**

280

### 281 *1. Sequence Alignments*

282

283 The *Vgsc* -1 cDNA sequences for *Cx. tarsalis* (GenBank No. MW176090), *Cx.*  
284 *erythrothorax* (GenBank No. MW176091) and *Cx. pipiens* (GenBank No. KY171978;  
285 [33]) were aligned using BLAST. There was 95.7% identity with the greatest divergence

286 coming from the *Cx. pipiens* sequence. The forward and reverse primers matched  
287 100% for all three species, however there were two mismatched nucleotides in the  
288 probe for *Cx. pipiens* (Figure 2, red boxes). These mismatches in *Cx. pipiens* resulted in  
289 less RT-PCR product relative to *Cx. tarsalis* and *Cx. erythrothorax* and no cross  
290 amplification of the wildtype and mutant RT-PCR probes as was observed for *Cx.*  
291 *tarsalis* and *Cx. erythrothorax* (Figure 3).

292

## 293 2. Interpreting RT-PCR Results

294

295 Increased FAM or HEX fluorescence indicated a homozygous wildtype or mutant  
296 genotype, respectively (Figures 3A, 3C, 3D, 3F). A similar quantity of FAM and HEX  
297 fluorescence indicated that the specimen had a heterozygous genotype (Figures 3B,  
298 3E). Allelic discrimination plots for *Cx. pipiens* and *Cx. tarsalis*, respectively, were used  
299 to identify outliers (Figure 4). Performance of the assay was also assessed using  $\Delta$ CT  
300 values between the two probes as described below.

301

302 The  $\Delta$ CT values for both *Cx. tarsalis* and *Cx. pipiens* were analyzed to determine a  
303 cutoff value for homozygous and heterozygous samples. For *Cx. tarsalis* the average  
304  $\Delta$ CT value of the heterozygous genotype was  $0.264 \pm 0.238$  with a range of 0.008 –  
305 0.932. Based on this information, *Cx. tarsalis* samples with a  $\Delta$ CT of  $<1$  were  
306 considered heterozygous. The average  $\Delta$ CT values for mutant homozygous *Cx. tarsalis*  
307 was  $2.944 \pm 0.413$  with a range of 2.077 – 3.964 and an average of  $3.107 \pm 0.782$  with  
308 a range of 2.044 – 6.593 for homozygous wildtype. Therefore, samples with  $\Delta$ CT

309 values >2 were considered homozygous.  $\Delta$ CT values for *Cx. erythrothorax* resembled  
310 *Cx. tarsalis* for homozygous wildtype, and was the only genotype detected for that  
311 species. Heterozygous  $\Delta$ CT values were used to determine the *Cx. pipiens* genotypes  
312 because the opposing probes did not typically cross amplify for homozygous samples.  
313 Rarely, the opposing probe in *Cx. pipiens* samples amplified to produce a large  $\Delta$ CT  
314 value. The average  $\Delta$ CT of heterozygous *Cx. pipiens* samples was  $0.981 \pm 0.396$  with a  
315 range of 0.164 – 1.779. Based on these findings, *Cx. pipiens* samples with  $\Delta$ CT values  
316 under 2 were considered heterozygous and samples with undetermined or extremely  
317 large  $\Delta$ CT values were considered homozygous.

318  
319 Atypical amplification curves were occasionally observed for *Cx. pipiens* samples (< 5%  
320 of total), suggesting these mosquitoes may have been misidentified and were instead  
321 *Cx. erythrothorax*. *Culex pipiens* and *Cx. erythrothorax* are morphologically similar and  
322 can be mistaken for each other [4]. To help determine if the *Cx. pipiens* with  
323 uncharacteristic amplification curves may have been misidentified, we tested them  
324 using the *Cx. pipiens* qPCR assay that only produces a PCR product using nucleic acid  
325 isolated from *Cx. pipiens* or *Cx. quinquefasciatus* [28]. Each of those samples failed to  
326 amplify a product on the *Cx. pipiens* qPCR assay, providing additional evidence that the  
327 mosquitoes may have indeed been *Cx. erythrothorax*. *Culex tarsalis*, *Cx. pipiens*, and  
328 *Cx. erythrothorax* were the most prevalent *Culex* species collected during the study  
329 period. We also tested *Culex stigmatosoma* Dyar and *Culex apicalis* Adams. The low  
330 sample size for these species did not allow us to generate average  $\Delta$ CT values.  
331 However, the amplification curves and sequenced PCR products were similar to *Cx.*

332 *pipiens* or *Cx. tarsalis* (Figure S1), suggesting the *Culex RTkdr* assay may be effective  
333 for those species as well.

334

### 335 3. Validation Results

336

#### 337 3.1 Insecticide Susceptibility Assays

338

339 CDC bottle bioassays were used to identify *Cx. tarsalis* that were resistant or  
340 susceptible to permethrin and deltamethrin. Two lab-reared strains of *Cx. tarsalis* were  
341 assessed; one with known sensitivity to pyrethroids (KNWR strain) and another that  
342 displayed resistance (Conaway strain). The *Culex RTkdr* assay was used subsequently  
343 to determine the *kdr* SNP genotype of Conaway strain mosquitoes that were assessed  
344 in the bottle bioassay. Mortality or knockdown was on average less than 5% in  
345 mosquitoes placed in bottles that contained only diluent. At the 60 min time point, all  
346 susceptible strain (KNWR) mosquitoes had succumbed to permethrin and deltamethrin  
347 (Figure 5). At the 45 min time point, when the average mortality was less than 100% for  
348 all treatments, the Conaway strain was 54.5- and 58.8-fold more resistant to permethrin  
349 and deltamethrin, respectively. Resistance ratios of these magnitudes indicate that the  
350 Conaway strain was highly resistant to the insecticides. At 180 min,  $21 \pm 4\%$  of the  
351 resistant Conaway strain mosquitoes had succumbed to permethrin and  $38 \pm 9\%$  to  
352 deltamethrin (Figure 5). The slopes of the linear regression lines were significantly  
353 different for the Conway and KNWR strains (permethrin:  $F(1,50) = 309.2$ ,  $P < 0.001$ ;  
354 deltamethrin:  $F(1,50) = 50.84$ ,  $P < 0.001$ ), suggesting that their biological responses to



355 the insecticides were different. The World Health Organization (WHO) classifies a  
356 population as resistant when mortality is below 90% [34]. The higher mortality rate  
357 observed in deltamethrin is expected as deltamethrin is a type II pyrethroid. Permethrin,  
358 a type I pyrethroid, may be more effective at knockdown because type I pyrethroids  
359 dissociate from the target faster than type II [12]. Because type II compounds, like  
360 deltamethrin, remain bound to the target longer, they are more effective at killing  
361 insects.

362

363 The genotype at the *kdr* SNP of the Conaway strain mosquitoes that survived or  
364 succumbed to permethrin or deltamethrin in the bottle bioassays was determined using  
365 the *Culex* RT*kdr* assay. All of the mosquitoes that survived exposure to permethrin or  
366 deltamethrin were homozygous mutant at the *kdr* SNP. Although the heterozygous,  
367 mutant and wildtype genotypes were observed only in mosquitoes that succumbed to  
368 the insecticides, there was no significant difference in the distribution of the genotypes  
369 in the bottle bioassays (Permethrin:  $F(2,2) = 18.21$ ,  $P = 0.0521$ ; Deltamethrin:  $F(2,2) =$   
370  $5.569$ ,  $P = 0.1522$ ). Genotype results from the *Culex* RT*kdr* assay were confirmed by  
371 sequencing PCR products and viewing chromatograms. Chromatograms revealed a  
372 second *kdr* mutation at the 1014 amino acid among the resistant Conaway strain  
373 (Figure 6). Of the 47 BBA Conaway mosquitoes sequenced, 6 (13%) were  
374 heterozygous for the phenylalanine and serine *kdr* mutations. Both mutations were  
375 previously described in *Cx. quinquefasciatus* [35]. The serine *kdr* mutation may be  
376 associated with cross-resistance between DDT and pyrethroids [35]. Because DDT  
377 persists in the environment [36], it may have exerted a selective pressure on

378 mosquitoes in the Conaway rice field that contributed to propagating the serine *kdr*  
379 mutation.

380

### 381 3.2 *Culex pipiens kdr* detection Taqman qPCR

382

383 To determine the fidelity of the *Culex RTkdr* assay, individual *Cx. pipiens* mosquitoes  
384 were evaluated with both the *Culex RTkdr* and the *Cx. pipiens* qPCR assays (N = 75  
385 mosquitoes). Three specimens (4%) failed to amplify a product after 30 PCR cycles in  
386 the *Culex RTkdr* assay and were excluded. Of the remaining mosquitoes, 69/72 (96%)  
387 results were concordant across both assays. Discordant results were sequenced to  
388 determine the correct genotypic call. Chromatograms for the three (4%) discordant  
389 samples indicated the mosquitoes were heterozygous and in agreement with the *Culex*  
390 *RTkdr* results, demonstrating that the *Culex RTkdr* assay was highly accurate (Table 2;  
391 paired t test, P > 0.9999).

392

393 Table 2. Validating the *Culex RTkdr* assay using a *Cx. pipiens* qPCR Taqman assay

| N  | <i>Culex RTkdr</i> Assay |       |      | <i>Cx. pipiens</i> qPCR Assay |       |      |
|----|--------------------------|-------|------|-------------------------------|-------|------|
|    | TTA                      | TTA/T | TTT  | TTA                           | TTA/T | TTT  |
|    | (SS)                     | (RS)  | (RR) | (SS)                          | (RS)  | (RR) |
| 72 | 23                       | 26    | 23   | 23                            | 23    | 26   |

394

395 Susceptible homozygous (SS) TTA SNP, Heterozygous (RS) TTA/T SNP, Resistant  
396 homozygous (RR) TTT SNP

397

398 *4.3 Sequencing*

399

400 PCR products from the *Culex* RT*kdr* assay were sequenced to further assess assay  
401 fidelity across five *Culex* species (N = 170; Table 3). Greater than 99% (169 out of 170)  
402 of the specimens were concordant with the sequencing and *Culex* RT*kdr* assay results  
403 (Table 3). The single discordant sample was misidentified as homozygous mutant by  
404 the *Culex* RT*kdr* assay, but the chromatogram revealed two peaks at the SNP location,  
405 indicating the mosquito was heterozygous (not shown). Using the sequencing results as  
406 the “true” result, we found the accuracy of the *Culex* RT*kdr* assay to be greater than  
407 99%. High accuracy is common among both qPCR and qRT-PCR assays [37, 38].  
408 Among the mosquitoes that were collected in Alameda County, only the L1014F  
409 mutation was found.

410

411 Table 3. Validating the *Culex* RT*kdr* assay by sequencing the resulting PCR products

| Species (N)                      | RT-PCR |       |      | Sequencing |       |      |
|----------------------------------|--------|-------|------|------------|-------|------|
|                                  | TTA    | TTA/T | TTT  | TTA        | TTA/T | TTT  |
|                                  | (SS)   | (RS)  | (RR) | (SS)       | (RS)  | (RR) |
| <i>Cx. pipiens</i> (51)          | 17     | 13    | 21   | 17         | 13    | 21   |
| <i>Cx. tarsalis</i> (97)         | 18     | 17    | 62   | 18         | 18    | 61   |
| <i>Cx. erythrothorax</i><br>(16) | 16     | 0     | 0    | 16         | 0     | 0    |

|                                |    |    |    |    |    |    |
|--------------------------------|----|----|----|----|----|----|
| <i>Cx. stigmatosoma</i><br>(5) | 5  | 0  | 0  | 5  | 0  | 0  |
| <i>Cx. apicalis</i> (1)        | 0  | 0  | 1  | 0  | 0  | 1  |
| Total (170)                    | 56 | 30 | 84 | 56 | 31 | 83 |

412

### 413 5. Distribution of Pyrethroid Resistance

414

415 The *Culex* RT*kdr* assay was used to assess the geographic distribution of the L1014F  
416 *kdr* mutation in Alameda County (Figure 7). Among the individual *Culex spp.* that were  
417 tested, 26.2% were homozygous resistant, 20.6% were heterozygous, and 53.3% were  
418 homozygous susceptible (N = 1383 mosquitoes). Ordinal logistic regression was used  
419 to determine associations between genotype, mosquito species, region of collection and  
420 area type. Because no resistance was identified in *Cx. erythrothorax*, ordinal logistic  
421 regression models were fit only to *Cx. pipiens* and *Cx. tarsalis* data. Table 4  
422 summarizes the statistical results examining allele frequency and odds of resistant  
423 genotypes (heterozygous and homozygous resistant). The overall resistant allele  
424 frequency ( $F_R$ ) was highest among *Cx. pipiens* (0.57), low for *Cx. tarsalis* (0.15) and not  
425 present for *Cx. erythrothorax* (0.00). *Culex pipiens* had 8.99 times greater odds of  
426 being heterozygous or homozygous resistant compared to *Cx. tarsalis* (Table 4, 95%CI:  
427 6.96 - 11.69). Adjusting for region and area type increased the association between  
428 resistance and *Cx. pipiens* (Table 4; OR: 11.01 (8.36 - 14.63)). The inland region  
429 revealed a higher  $F_R$  compared to the bayside region for both *Cx pipiens* and *Cx.*

430 *tarsalis* (Figure 8). *Culex erythrothorax* was not present the inland region during the  
 431 study period and all bayside *Cx. erythrothorax* were homozygous susceptible.

432 High resistant allelic frequencies were found previously in *Cx. pipiens* complex  
 433 mosquitoes [11] [39]. *Culex erythrothorax* reproduce in heavily vegetated regions of  
 434 shallow ponds and can be highly abundant in marsh habitats [40, 41]. While *Cx.*  
 435 *erythrothorax* were typically found in bayside wetlands, *Cx. pipiens* and *Cx. tarsalis*  
 436 were both present inland, yet the *Cx. pipiens* were far more resistant. Previous studies  
 437 of urban creeks and outfall of storm drains in California found high levels of pyrethroids.  
 438 The pyrethroids were proposed to have originated from homeowner use or structural  
 439 pest control [20, 42]. Sites that were not near agriculture occasionally contained  
 440 comparable levels of pyrethroids to those found in creeks near agricultural sites. The  
 441 high levels of pyrethroids found in the sediments of the outfalls of storm drains may  
 442 contribute to the resistance that we observed in *Cx. pipiens* as they reproduce in and  
 443 around storm drain and storm drain outfalls [5, 43].

444

445 **Table 4.** Genotypes detected,  $F_R$ , unadjusted and adjusted odds ratios among  
 446 species, geographical region and land area type.

| Variable                 | Genotype |     |     |     | Odds Ratio, OR (95% CI) |                       |                      |
|--------------------------|----------|-----|-----|-----|-------------------------|-----------------------|----------------------|
|                          | N        | SS  | SR  | RR  | $F_R$                   | Unadjusted            | Adjusted             |
| <b>Species</b>           |          |     |     |     |                         |                       |                      |
| <i>Cx. erythrothorax</i> | 126      | 126 | 0   | 0   | 0                       | NA                    | NA                   |
| <i>Cx. tarsalis</i>      | 507      | 401 | 57  | 49  | 0.15                    | Ref                   | Ref                  |
| <i>Cx. pipiens</i>       | 744      | 208 | 226 | 310 | 0.57                    | 8.99 ( 6.98 - 11.69 ) | 11.01 ( 8.36-14.63 ) |

| Region      |     |     |     |     |      |                      |                      |
|-------------|-----|-----|-----|-----|------|----------------------|----------------------|
| Bayside     | 744 | 519 | 136 | 89  | 0.21 | Ref                  | Ref                  |
| Inland      | 633 | 216 | 147 | 270 | 0.54 | 3.92 ( 3.15 - 4.89 ) | 4.89 ( 3.79 - 6.33 ) |
| Area Type   |     |     |     |     |      |                      |                      |
| Wildlife    | 484 | 296 | 94  | 94  | 0.29 | Ref                  | Ref                  |
| Urban       | 306 | 123 | 81  | 102 | 0.47 | 1.95 ( 1.47 - 2.58 ) | 0.96 ( 0.70 - 1.32 ) |
| Industrial  | 449 | 251 | 83  | 115 | 0.35 | 1.13 ( 0.87 - 1.46 ) | 0.77 ( 0.57 - 1.03 ) |
| Agriculture | 144 | 66  | 27  | 51  | 0.45 | 1.74 ( 1.21 - 2.53 ) | 0.89 ( 0.58 - 1.37 ) |

447 Homozygous susceptible (SS), heterozygous (RS), homozygous resistant (RR)

448

449 Mosquitoes from inland regions of Alameda County had elevated odds of containing the  
450 *kdr* SNP that is associated with pyrethroid resistance (Table 4; OR: 3.92 (3.15 - 4.89)).  
451 Adjusting for species and area type increased the association between resistance and  
452 mosquitoes that were collected from inland sites (OR: 4.89 (3.79 - 6.33)), suggesting an  
453 association present between inland mosquitoes and higher levels of resistance. The  
454 California Pesticide Information Portal (CPIP) shows that the top uses of pyrethroids in  
455 Alameda County were for structural pest control, wine grapes, almonds, pistachios and  
456 brussels sprouts (<https://calpip.cdpr.ca.gov/main.cfm>). While CPIP does not specify the  
457 township for structural pest control, using CPIP in conjunction with Pesticide Use Report  
458 (PUR) data, we were able to narrow agricultural pesticide use down to several locations  
459 within the inland region of Alameda County. Agriculture is widely practiced within the  
460 inland region of Alameda County and is less common in the bayside region. Studies of  
461 *Anopheles gambiae* suggest that insecticides from agriculture likely contribute to

462 resistance in *Anopheles gambiae*, the malaria mosquito [21, 44, 45]. A similar pattern of  
463 pyrethroid use in agriculture cooccurring with pyrethroid resistance was observed in *Cx.*  
464 *pipiens* and *Cx. tarsalis*, two important vectors of WNV in North America.

465

## 466 **Conclusion**

467

468 We developed a simple to use RT-qPCR assay that detects the *kdr* SNP that is  
469 associated with resistance to pyrethroid insecticides in at least five *Culex spp.* of  
470 mosquito. Like all PCR-based assays, the *Culex RTkdr* assay is not without limitations.  
471 It assay does not detect the serine *kdr* mutation that was discovered by sequencing the  
472 *RTkdr* assay PCR product from the Conaway strain (Figure 6). The serine *kdr* mutation  
473 suggests prior selective pressures, possibly from historical applications of pyrethroids or  
474 DDT. The *Culex RTkdr* assay also does not account for other pyrethroid resistance  
475 mechanisms such as overexpression or mutation of CYP9M10. Overexpression of  
476 CYP9M10 allows for increased detoxification of pyrethroids by cytochrome P450s  
477 monooxygenases [5, 46]. It was extensively validated for only *Cx. pipiens*, *Cx. tarsalis*  
478 and *Cx. erythrothorax* mosquitoes as we had a limited number of other *Culex* species  
479 available for the study. However, preliminary results suggest the assay performs for *Cx.*  
480 *apicalis* and *Cx. stigmatosoma*. Lastly, we know the assay performs well using Northern  
481 California mosquitoes, but genetic diversity across different countries may prevent the  
482 assay from detecting the L1014F mutation in these *Culex* species worldwide. More  
483 research is needed to determine whether this assay could be applied to mosquitoes  
484 collected outside of California.

485

486 Despite public health pesticide applications accounting for <1% of statewide pesticide  
487 use between 1993-2007 and with Alameda County Mosquito Abatement District having  
488 applied less than 300 ml of adulticide in the decade covering 2010 to 2020, pyrethroid  
489 resistance remains a concern [47]. Commercial use of insecticides for both structural  
490 and agricultural pest control may contribute to the higher pyrethroid resistance in  
491 mosquitoes from the inland region. In countries that ceased pyrethroid applications by  
492 vector control agencies, resistance remained high, likely due to household insecticides  
493 that contain pyrethroids [48].

494

495 The ability of the *Culex* RT*kdr* assay to perform well with multiple *Culex* species may  
496 benefit vector control agencies. It may be possible to apply this technique to other  
497 mosquito species as the *Vgsc* sequences of *Aedes aegypti* Linnaeus and *Aedes*  
498 *albopictus* Skuse revealed a high percent identity around the V1016G *kdr* mutation,  
499 suggesting the development of an *Aedes* qRT-PCR assay may be possible [38].

500 Application of pyrethroids to a resistant population can potentially drive heterozygous  
501 populations (RS) to the homozygous resistant genotype (RR) further concentrates the  
502 and releases unnecessary chemicals into the environment. Prior to the development of  
503 this *Culex* RT*kdr*, there was no quantitative PCR assay to detect the L1014F mutation in  
504 *Cx. tarsalis*. The development of our *Culex* RT*kdr* assay satiates the need for a simple  
505 and reliable *Cx. tarsalis* PCR pyrethroid-resistance detection assay. We hope the assay  
506 will improve testing for pyrethroid resistance among *Culex* species.

507



508 **FIGURE LEGENDS**

509 **Figure 1.** Schematic representation of sequencing primer (cyan), PCR primers (yellow),  
510 probes (red and blue), SNP and the intron of the *kdr* loci in *Vgsc* for *Cx. tarsalis*.

511

512 **Figure 2.** Basic Local Alignment comparing *Cx. tarsalis* (Query, Genbank No.  
513 MW176090) to *Cx. pipiens* (Subject, Genbank No. KY171978). Yellow boxes denote  
514 location of forward and reverse primers, purple box denotes probe location and red are  
515 mismatched bases.

516

517 **Figure 3.** Amplification plots ( $\Delta$ RN vs Cycle Number) with the wildtype probe labeled in  
518 blue and mutant probe in red. **(A)** *Culex pipiens* homozygous wildtype **(B)** *Culex pipiens*  
519 heterozygous **(C)** *Culex pipiens* homozygous mutant **(D)** *Culex tarsalis* homozygous  
520 wildtype **(E)** *Culex tarsalis* heterozygous **(F)** *Culex tarsalis* homozygous mutant.

521

522 **Figure 4.** Allelic discrimination plots (Wildtype RN vs Mutant RN) for **(A)** *Culex pipiens*  
523 and **(B)** *Culex tarsalis*. Homozygous mutants are labeled with red ellipses,  
524 heterozygous with yellow ellipses, and homozygous wildtype are labeled with blue  
525 ellipses. Homozygous controls are labeled as open squares, outlined in their respective  
526 color. No template controls are labeled as black squares.

527

528

529 **Figure 5. Bottle bioassay.** Permethrin BBA results are depicted with closed squares  
530 with either blue or red representing permethrin susceptible or permethrin resistant,  
531 respectively. Deltamethrin BBA results are shown with open circles with either light blue  
532 or pink representing deltamethrin susceptible or deltamethrin resistant, respectively.  
533 Deltamethrin graphs are offset by 2 minutes for clarity. Equation of lines: Deltamethrin:  
534 susceptible KNWR strain,  $Y = 1.785 * X - 6.627$  ( $R^2 = 0.7403$ ); resistant Conaway strain,  
535  $Y = 0.2499 * X - 6.805$  ( $R^2 = 0.5130$ ); Permethrin: susceptible KNWR strain,  $Y = 1.818 * X$   
536  $- 1.553$  ( $R^2 = 0.9283$ ); resistant Conaway strain,  $Y = 0.1337 * X - 3.682$  ( $R^2 = 0.6443$ )

537

538 **Figure 6.** Chromatogram depicting heterozygosity for both the phenylalanine and  
539 serine/*kdr* mutations at the 1014 amino acid.

540

541 **Figure 7.** Resistance mapping within Alameda County showing **(A)** *Culex pipiens* and  
542 **(B)** *Culex tarsalis* in bayside and inland regions.

543

544 **Figure 8.** Resistant allele frequency ( $F_R$ ) of the L1014F *kdr* mutation by species and  
545 region. Bright blue, dark blue and medium blue bars represent  $F_R$  for *Cx. erythrothorax*  
546 (no resistance detected), *Cx. pipiens* and *Cx. tarsalis*, respectively. The  $F_R$  for bayside  
547 *Cx. pipiens* and *Cx. tarsalis* was  $0.375 \pm 0.018$  and  $0.0840 \pm 0.012$ , respectively. The  
548  $F_R$  for inland *Cx pipiens* and *Cx. tarsalis* was  $0.749 \pm 0.016$  and  $0.230 \pm 0.016$ ,  
549 respectively.

550

551 **Figure S1.** *Culex* RT*kdr* assay amplification curves for **(A)** *Cx. stigmatosoma* (N = 3,  
552 each was heterozygous) and **(B)** *Cx. apicalis* (N = 3, two were homozygous mutant, one  
553 was heterozygous,).

554

## 555 REFERENCES

556

- 557 1. Farajollahi A, Fonseca DM, Kramer LD, Kilpatrick AM. "BIRD BITING"  
558 MOSQUITOES AND HUMAN DISEASE: A REVIEW OF THE ROLE OF CULEX  
559 PIPIENS COMPLEX MOSQUITOES IN EPIDEMIOLOGY. *Infect Genet Evol.*  
560 2011;11(7):1577-85. doi: 10.1016/j.meegid.2011.08.013.
- 561 2. Tempelis CH, Reeves WC, Bellamy RE, Lofy MF. A Three-Year Study of the  
562 Feeding Habits of *Culex tarsalis* in Kern County, California\*. *The American Journal of*  
563 *Tropical Medicine and Hygiene.* 1965;14(1):170-7. doi: 10.4269/ajtmh.1965.14.170.
- 564 3. Turell MJ, Dohm DJ, Sardelis MR, O'guinn ML, Andreadis TG, Blow JA. An  
565 Update on the Potential of North American Mosquitoes (Diptera: Culicidae) to Transmit  
566 West Nile Virus. *Journal of Medical Entomology.* 2005;42(1):57-62. doi:  
567 10.1093/jmedent/42.1.57.
- 568 4. (CDC) CfDC. Saint Louis Encephalitis | Transmission 2018 [cited 2020 March  
569 16]. Available from: <https://www.cdc.gov/sle/technical/transmission.html>.

- 570 5. Scott JG, Yoshimizu MH, Kasai S. Pyrethroid resistance in *Culex pipiens*  
571 mosquitoes. *Pesticide Biochemistry and Physiology*. 2015;120:68-76. doi:  
572 10.1016/j.pestbp.2014.12.018.
- 573 6. (CDPH). CDoPH. Latest West Nile Activity in California 2020. Available from:  
574 <http://westnile.ca.gov/>.
- 575 7. (CDC). CfDCaP. Saint Louis Encephalitis | Statistics & Maps 2019 [cited 2020  
576 March 16]. Available from: <https://www.cdc.gov/sle/technical/epi.html>.
- 577 8. Costa LG. Chapter 9 - The neurotoxicity of organochlorine and pyrethroid  
578 pesticides. In: Lotti M, Bleecker ML, editors. *Handbook of Clinical Neurology*. 131:  
579 Elsevier; 2015. p. 135-48.
- 580 9. Zhorov BS, Dong K. Elucidation of pyrethroid and DDT receptor sites in the  
581 voltage-gated sodium channel. *NeuroToxicology*. 2017;60:171-7. doi:  
582 <https://doi.org/10.1016/j.neuro.2016.08.013>.
- 583 10. Dong K, Du Y, Rinkevich F, Nomura Y, Xu P, Wang L, et al. Molecular Biology of  
584 Insect Sodium Channels and Pyrethroid Resistance. *Insect Biochemistry and Molecular*  
585 *Biology*. 2014;50:1-17. doi: 10.1016/j.ibmb.2014.03.012.
- 586 11. Yoshimizu MH, Padgett K, Kramer V. Surveillance of a kdr Resistance Mutation  
587 in *Culex pipiens* (Diptera: Culicidae) and *Culex quinquefasciatus* in California. *Journal of*  
588 *Medical Entomology*. 2020. doi: 10.1093/jme/tjz208.
- 589 12. Davies TGE, Field LM, Usherwood PNR, Williamson MS. DDT, pyrethrins,  
590 pyrethroids and insect sodium channels. *IUBMB Life*. 2007;59(3):151-62. doi:  
591 10.1080/15216540701352042.

- 592 13. Brogden W, Chan A. Guideline for Evaluating Insecticide Resistance in Vectors  
593 Using the CDC Bottle Bioassay. Retrieved from  
594 [http://www.cdc.gov/malaria/resources/pdf/fsp/ir\\_manual/ir\\_cdc\\_bioassay\\_en.pdf](http://www.cdc.gov/malaria/resources/pdf/fsp/ir_manual/ir_cdc_bioassay_en.pdf). 2012.
- 595 14. Reid MC, McKenzie FE. The contribution of agricultural insecticide use to  
596 increasing insecticide resistance in African malaria vectors. *Malaria Journal*.  
597 2016;15(1):107. doi: 10.1186/s12936-016-1162-4.
- 598 15. Hien A, Soma D, Hema O, Bayili B, Namountougou M, Gnankiné O, et al.  
599 Evidence that agricultural use of pesticides selects pyrethroid resistance within  
600 *Anopheles gambiae* s.l. populations from cotton growing areas in Burkina Faso, West  
601 Africa. *PLoS ONE* 12(3): e0173098. <https://doi.org/10.1371/journal.pone.0173098>.  
602 2017.
- 603 16. Elnaiem D-EA, Kelley K, Wright S, Laffey R, Yoshimura G, Reed M, et al. Impact  
604 of Aerial Spraying of Pyrethrin Insecticide on *Culex pipiens* and *Culex tarsalis* (Diptera:  
605 Culicidae) Abundance and West Nile Virus Infection Rates in an Urban/Suburban Area  
606 of Sacramento County, California. *Journal of Medical Entomology*. 2008;45(4):751-7.  
607 doi: 10.1093/jmedent/45.4.751.
- 608 17. Reisen WK, Carroll BD, Takahashi R, Fang Y, Garcia S, Martinez VM, et al.  
609 Repeated West Nile Virus Epidemic Transmission in Kern County, California, 2004–  
610 2007. *Journal of Medical Entomology*. 2009;46(1):139-57. doi: 10.1603/033.046.0118.
- 611 18. Vanlandingham DL, Schneider BS, Klingler K, Fair J, Beasley D, Huang J, et al.  
612 REAL-TIME REVERSE TRANSCRIPTASE?POLYMERASE CHAIN REACTION  
613 QUANTIFICATION OF WEST NILE VIRUS TRANSMITTED BY CULEX PIPIENS

- 614 QUINQUEFASCIATUS. The American Journal of Tropical Medicine and Hygiene Am J  
615 Trop Med Hyg. 2004;71(1):120-3. doi: 10.4269/ajtmh.2004.71.120.
- 616 19. Batson J, Dudas G, Haas-Stapleton E, Kistler AL, Li LM, Logan P, et al. Single  
617 mosquito metatranscriptomics identifies vectors, emerging pathogens and reservoirs in  
618 one assay. bioRxiv. 2020:2020.02.10.942854. doi: 10.1101/2020.02.10.942854.
- 619 20. Amweg EL, Weston DP, You J, Lydy MJ. Pyrethroid Insecticides and Sediment  
620 Toxicity in Urban Creeks from California and Tennessee. Environmental Science &  
621 Technology. 2006;40(5):1700-6. doi: 10.1021/es051407c.
- 622 21. Nkya TE, Akhouayri I, Kisinza W, David J-P. Impact of environment on mosquito  
623 response to pyrethroid insecticides: Facts, evidences and prospects. Insect  
624 Biochemistry and Molecular Biology. 2013;43(4):407-16. doi:  
625 10.1016/j.ibmb.2012.10.006.
- 626 22. Brogdon WGC, A., editor Guideline for Evaluating Insecticide Resistance in  
627 Vectors Using the CDC Bottle Bioassay2012 2012.
- 628 23. Bolger AM, Lohse M, Usadel B. Trimmomatic: a flexible trimmer for Illumina  
629 sequence data. Bioinformatics. 2014;30(15):2114-20. doi:  
630 10.1093/bioinformatics/btu170.
- 631 24. Bankevich A, Nurk S, Antipov D, Gurevich AA, Dvorkin M, Kulikov AS, et al.  
632 SPAdes: A New Genome Assembly Algorithm and Its Applications to Single-Cell  
633 Sequencing. Journal of Computational Biology. 2012;19(5):455-77. doi:  
634 10.1089/cmb.2012.0021.
- 635 25. Langmead B, Salzberg SL. Fast gapped-read alignment with Bowtie 2. Nature  
636 Methods. 2012;9(4):357-9. doi: 10.1038/nmeth.1923.

- 637 26. Untergasser A, Cutcutache I, Koressaar T, Ye J, Faircloth BC, Remm M, et al.  
638 Primer3—new capabilities and interfaces. *Nucleic Acids Research*. 2012;40(15):e115-e.  
639 doi: 10.1093/nar/gks596.
- 640 27. BLAST: Basic Local Alignment Search Tool.
- 641 28. Chen L, Zhong D, Zhang D, Shi L, Zhou G, Gong M, et al. Molecular Ecology of  
642 Pyrethroid Knockdown Resistance in *Culex pipiens pallens* Mosquitoes. *PLOS ONE*.  
643 2010;5(7). doi: 10.1371/journal.pone.0011681.
- 644 29. Edgar RC. MUSCLE: multiple sequence alignment with high accuracy and high  
645 throughput. *Nucleic Acids Research*. 2004;32(5):1792-7. doi: 10.1093/nar/gkh340.
- 646 30. Venables WNR, Ripley BD. *Modern Applied Statistics with S*. 4 ed. Springer, New  
647 York2002.
- 648 31. Team RC. R: A language and environment for statistical computing Vienna,  
649 Austria2019. Available from: <https://www.R-project.org/>.
- 650 32. Wickham H. *ggplot2: Elegant Graphics for Data Analysis*. Springer-Verlag New  
651 York2016.
- 652 33. Tang W, Wang D, Wang J, Wu Z, Li L, Huang M, et al. Pyrethroid pesticide  
653 residues in the global environment: An overview. *Chemosphere*. 2018;191:990-1007.  
654 doi: 10.1016/j.chemosphere.2017.10.115.
- 655 34. WHO, Organizaiton WH. Test procedures for insecticide resistance monitoring in  
656 malaria vector mosquitoes (Second edition). Retrieved from  
657 <https://apps.who.int/iris/bitstream/handle/10665/250677/9789241511575-eng.pdf>. 2018.
- 658 35. Zhou L, Lawrence GG, Vineis JH, McAllister JC, Wirtz RA, Brogdon WG.  
659 Detection of Broadly Distributed Sodium Channel Alleles Characteristic of Insect

- 660 Pyrethroid Resistance in West Nile Virus Vector *Culex pipiens* Complex Mosquitoes in  
661 the United States. *Journal of Medical Entomology*. 2009;46(2):321-7. doi:  
662 10.1603/033.046.0217.
- 663 36. Mischke T. Agricultural sources of DDT residues in California's environment.  
664 1985.
- 665 37. Maignan M, Viglino D, Hablot M, Masson NT, Lebeugle A, Muret RC, et al.  
666 Diagnostic accuracy of a rapid RT-PCR assay for point-of-care detection of influenza  
667 A/B virus at emergency department admission: A prospective evaluation during the  
668 2017/2018 influenza season. *PLOS ONE*. 2019;14(5):e0216308. doi:  
669 10.1371/journal.pone.0216308.
- 670 38. Saingamsook J, Saeung A, Yanola J, Lumjuan N, Walton C, Somboon P. A  
671 multiplex PCR for detection of knockdown resistance mutations, V1016G and F1534C,  
672 in pyrethroid-resistant *Aedes aegypti*. *Parasites & Vectors*. 2017;10(1):465. doi:  
673 10.1186/s13071-017-2416-x.
- 674 39. Cornel AJ, McAbee RD, Rasgon J, Stanich MA, Scott TW, Coetzee M.  
675 Differences in Extent of Genetic Introgression Between Sympatric *Culex pipiens* and  
676 *Culex quinquefasciatus* (Diptera: Culicidae) in California and South Africa. *Journal of*  
677 *Medical Entomology*. 2003;40(1):36-51. doi: 10.1603/0022-2585-40.1.36.
- 678 40. Tietze NS, Stephenson, M. F., Sidhom, N. T., & Binding, P. L. Mark-recapture of  
679 *Culex erythrothorax* in Santa Cruz County, California. *J Am Mosq Control Assoc*.  
680 2003;19(2):134-8.



- 681 41. Workman PD, Walton, W. E. Emergence patterns of *Culex* mosquitoes at an  
682 experimental constructed treatment wetland in southern California. J Am Mosq Control  
683 Assoc. 2000;16(2):124-30.
- 684 42. Weston DP, Holmes RW, You J, Lydy MJ. Aquatic Toxicity Due to Residential  
685 Use of Pyrethroid Insecticides. Environmental Science & Technology.  
686 2005;39(24):9778-84. doi: 10.1021/es0506354.
- 687 43. Roos C, Uunk EJB. Effects of stormwater sewer discharges on the aquatic  
688 community in urban canals in Lelystad. Hydrobiological Bulletin. 1987;21(2):207-12. doi:  
689 10.1007/BF02255446.
- 690 44. Diabaté A, Baldet T, Chandre F, Akoobeto M, Guiguemdé TR, Darriet F, et al.  
691 The role of agricultural use of insecticides in resistance to pyrethroids in *Anopheles*  
692 *gambiae* s.l. in Burkina Faso. The American journal of tropical medicine and hygiene.  
693 2002;67 6:617-22.
- 694 45. Yadouléton A, N'Guessan R, Allagbé H, Asidi A, Boko M, Osse R, et al. The  
695 impact of the expansion of urban vegetable farming on malaria transmission in major  
696 cities of Benin. Parasites & Vectors. 2010;3(1):118. doi: 10.1186/1756-3305-3-118.
- 697 46. Scott JG. Cytochromes P450 and insecticide resistance. Insect Biochemistry and  
698 Molecular Biology. 1999;29(9):757-77. doi: 10.1016/S0965-1748(99)00038-7.
- 699 47. Howard TS, Novak MG, Kramer VL, Bronson LR. Public health pesticide use in  
700 California: a comparative summary. J Am Mosq Control Assoc. 2010;26(3):349-53. doi:  
701 10.2987/10-5997.1.
- 702 48. Macoris MdL, Martins AJ, Andrighetti MTM, Lima JBP, Valle D. Pyrethroid  
703 resistance persists after ten years without usage against *Aedes aegypti* in governmental

704 campaigns: Lessons from São Paulo State, Brazil. PLoS Negl Trop Dis. 2018;12(3). doi:

705 10.1371/journal.pntd.0006390.

706

bioRxiv preprint doi: <https://doi.org/10.1101/2021.05.18.444631>; this version posted May 18, 2021. The copyright holder for this preprint (which was not certified by peer review) is the author/funder, who has granted bioRxiv a license to display the preprint in perpetuity. It is made available under aCC-BY 4.0 International license.

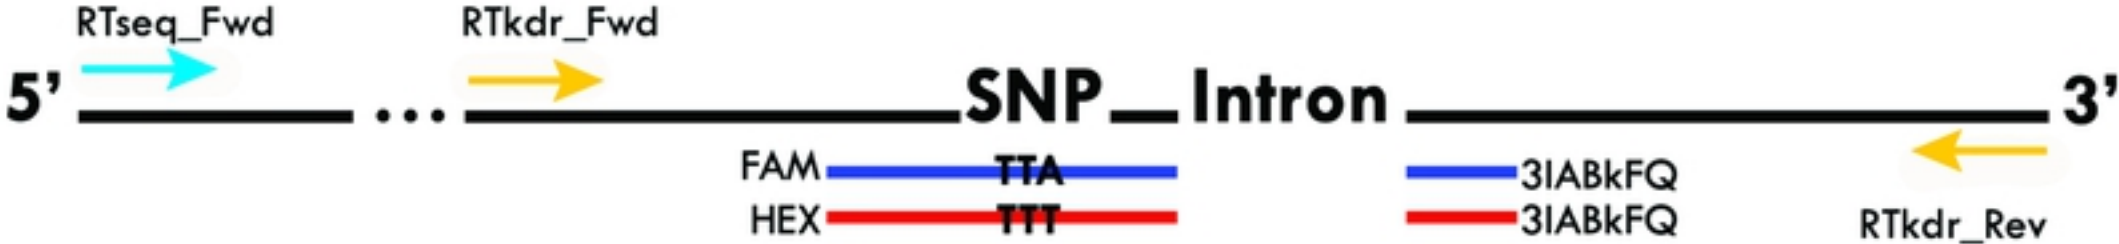

bioRxiv preprint doi: <https://doi.org/10.1101/2021.05.18.444631>; this version posted May 18, 2021. The copyright holder for this preprint (which was not certified by peer review) is the author/funder, who has granted bioRxiv a license to display the preprint in perpetuity. It is made available under aCC-BY 4.0 International license.

|       |     |                                                               |     |
|-------|-----|---------------------------------------------------------------|-----|
| Query | 1   | CCTGCATTCCGTTCTTCTTGGCCACCGTAGTGATAGGAAACCTTAGTCGTACTTAACCTTT | 60  |
|       |     |                                                               |     |
| Sbjct | 1   | CCTGCATTCCGTTCTTCTTGGCCACCGTAGTGATAGGAAATTTAGTCGTTCTTAACCTTT  | 60  |
| Query | 61  | TCTTAGCCTTGCTTTTGTCCAACCTTGGTTCCTCGAGTCTGTCGGCACCGACGGCCGACA  | 120 |
|       |     |                                                               |     |
| Sbjct | 61  | TCTTAGCCTTGCTTTTGTCCAACCTTGGTTCCTCGAGTTTGTGGCGCCACAGCCGACA    | 120 |
| Query | 121 | ACGAAACGAACAAGATCGC                                           | 139 |
|       |     |                                                               |     |
| Sbjct | 121 | ACGAAACGAACAAGATCGC                                           | 139 |

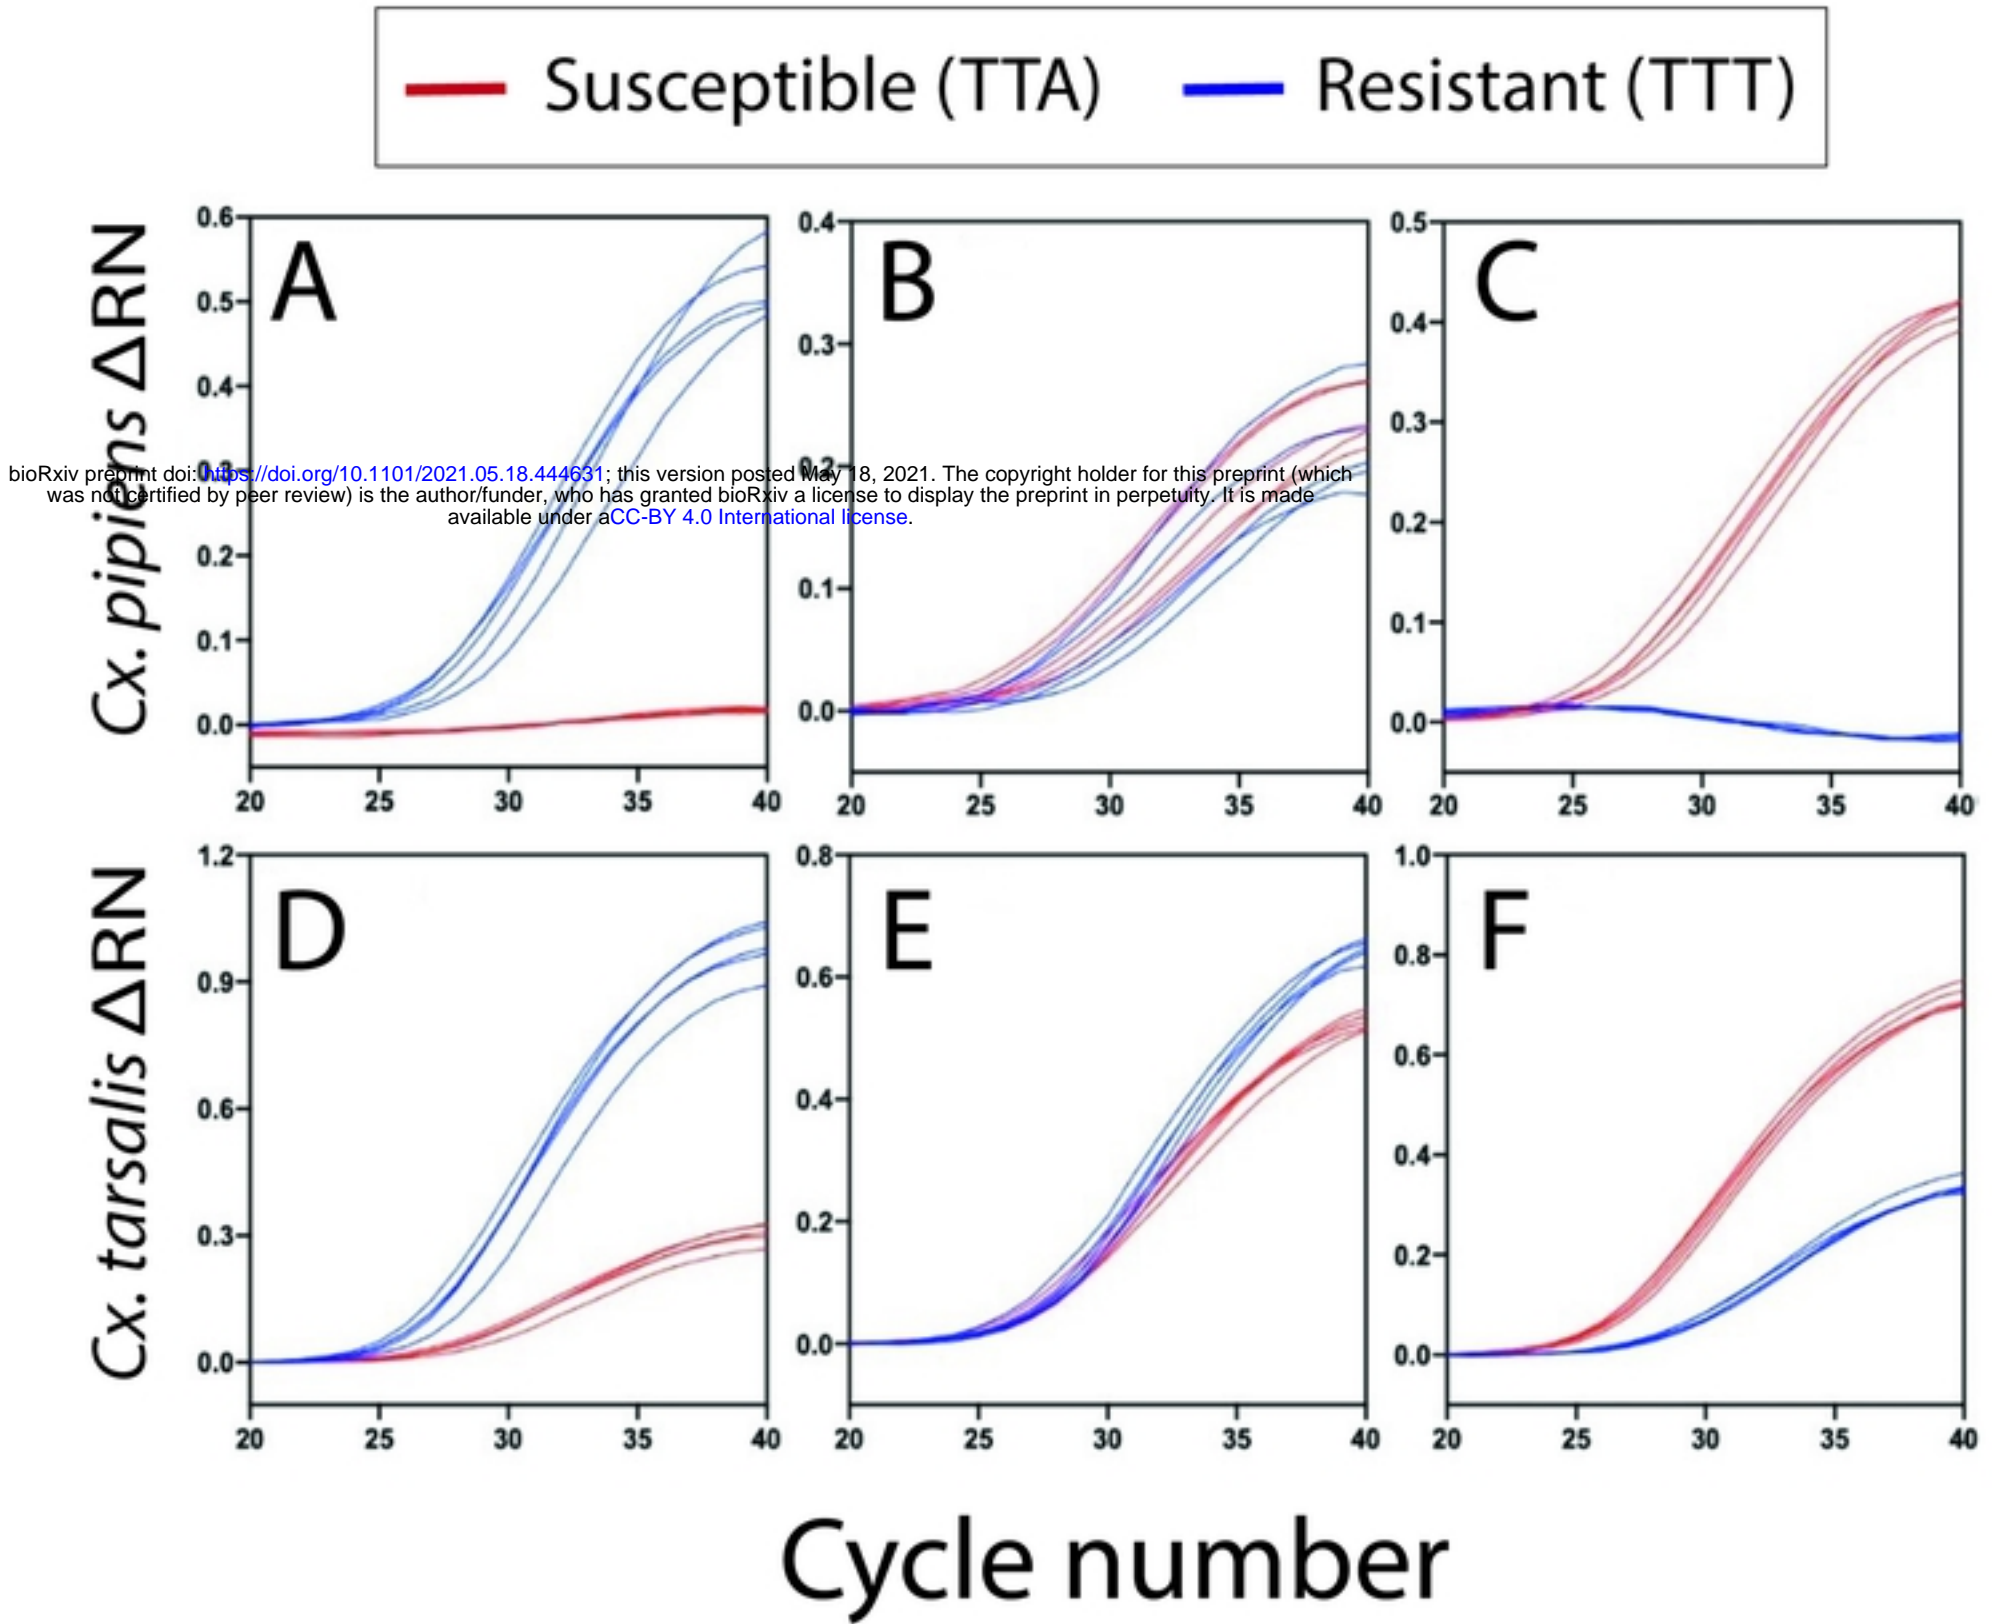

● Homozygous susceptible    ● Heterozygous    ● Homozygous resistant

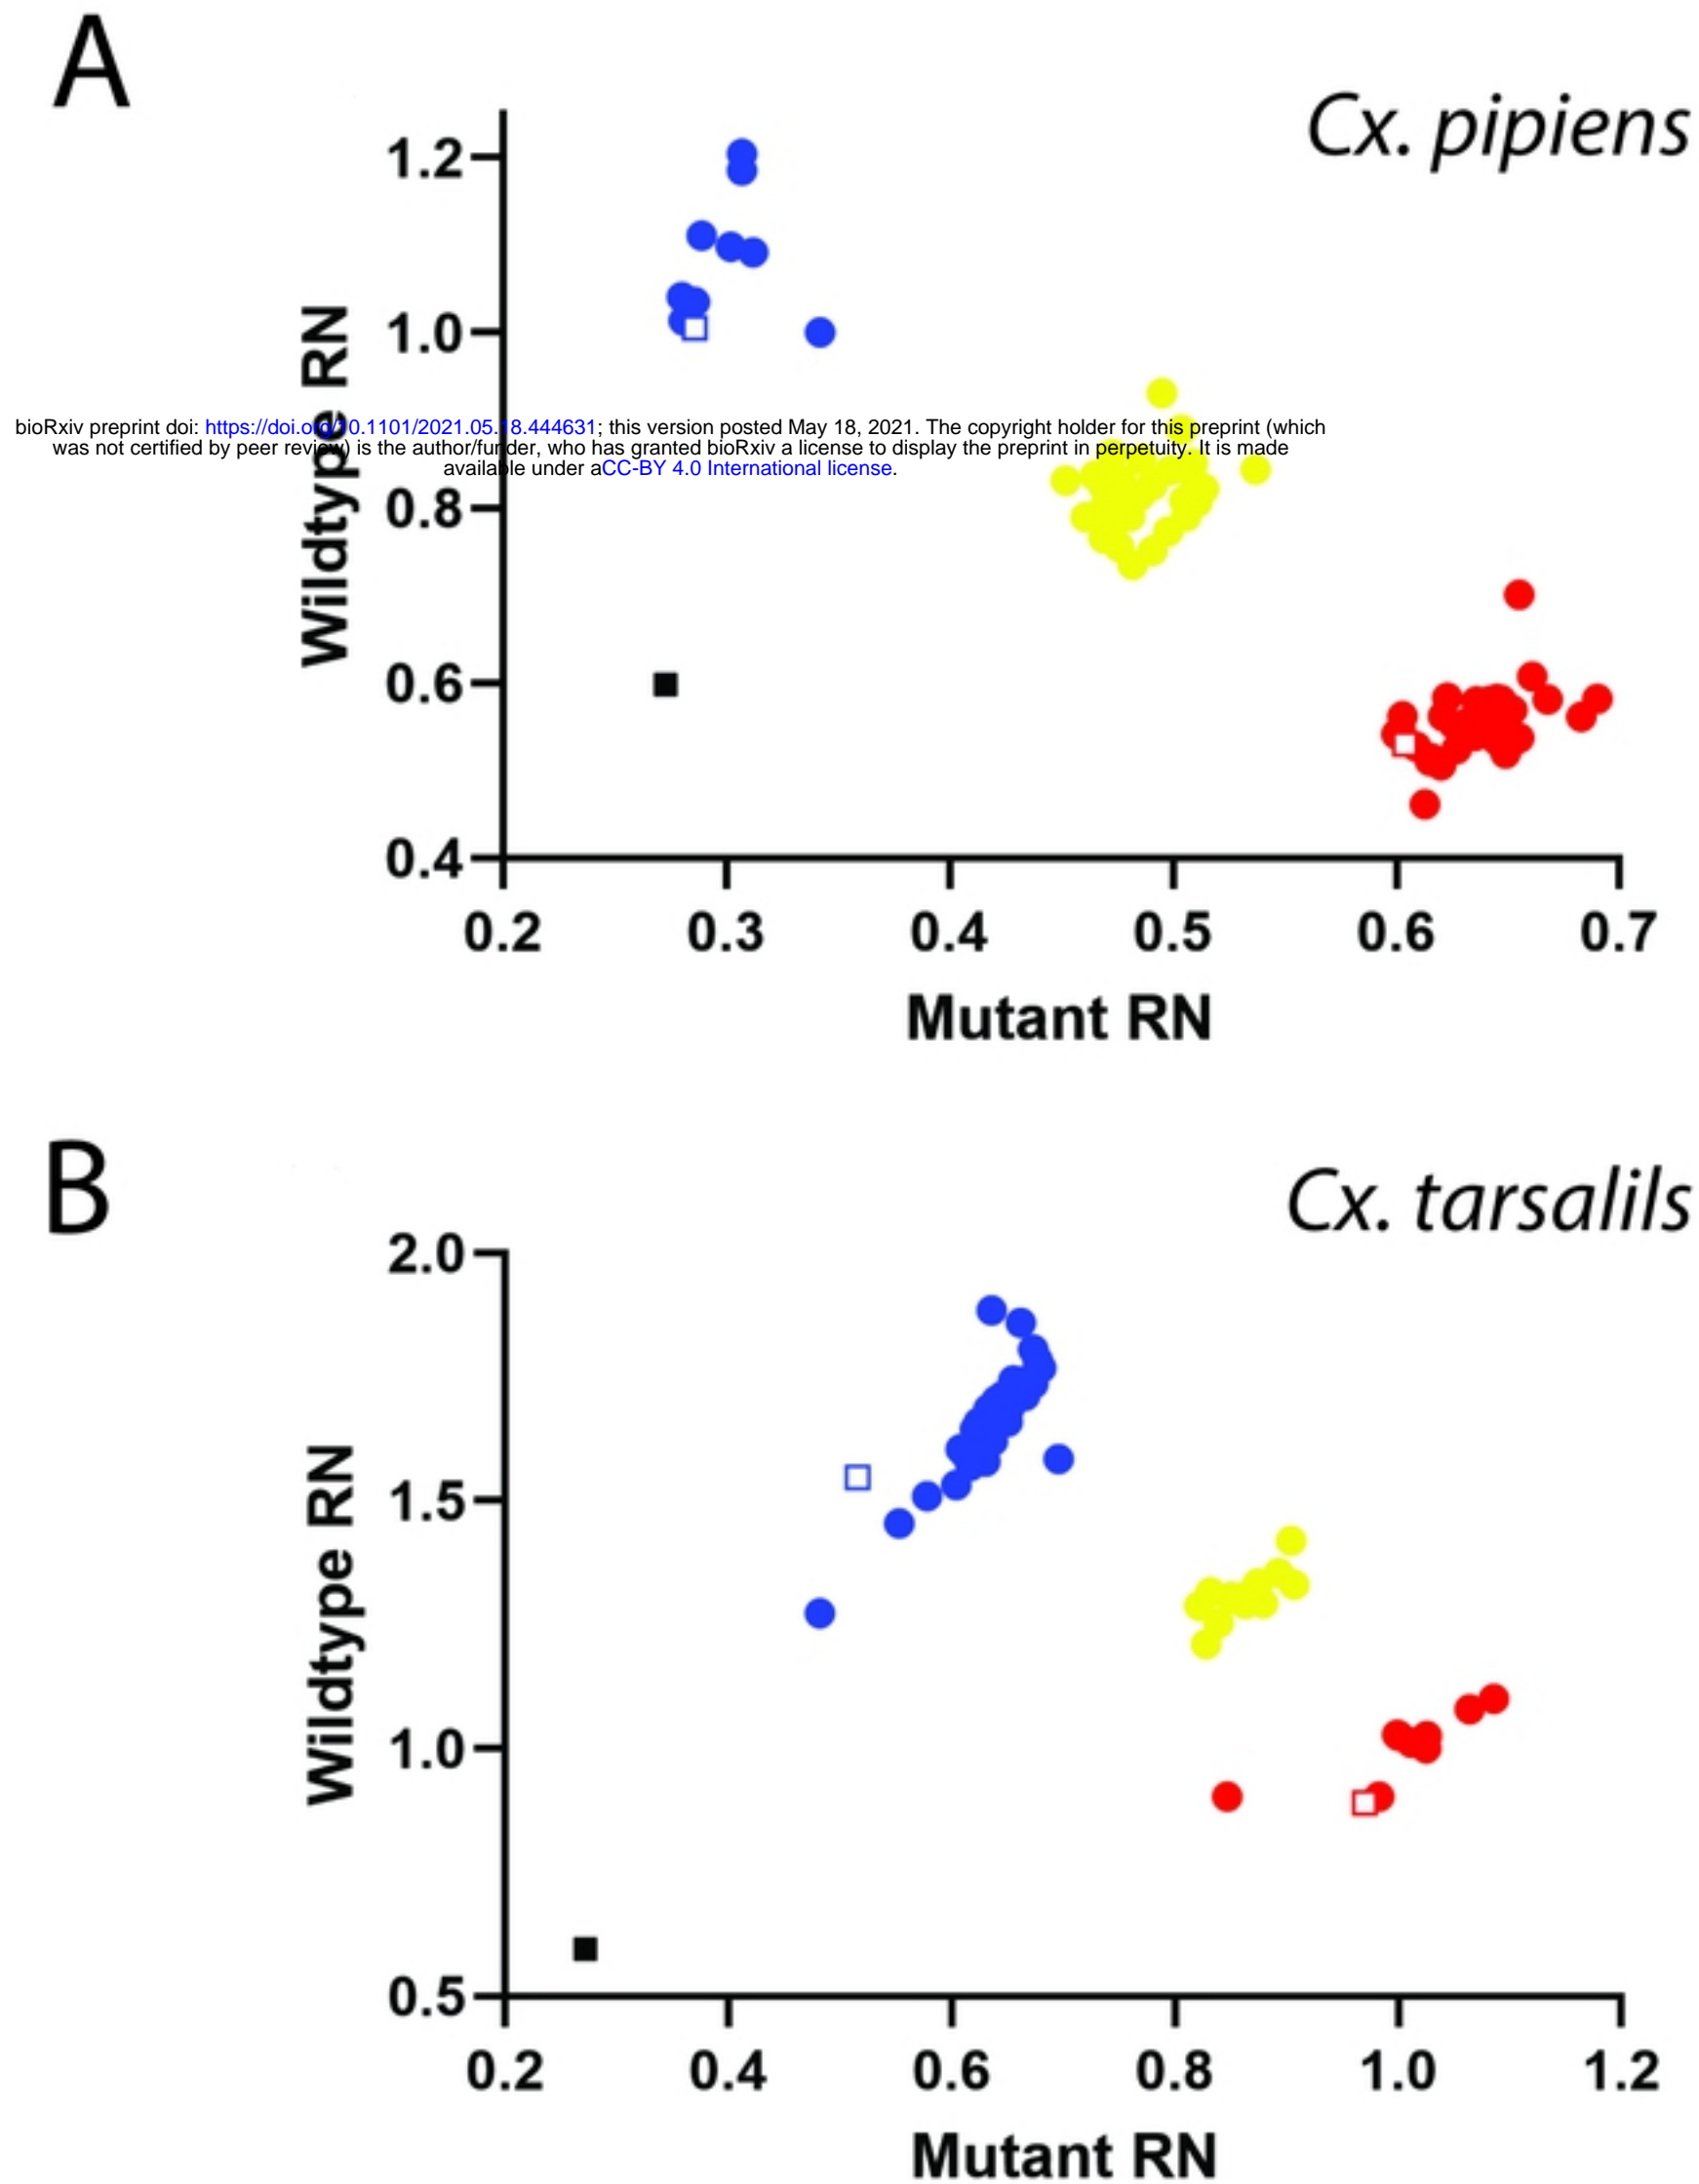



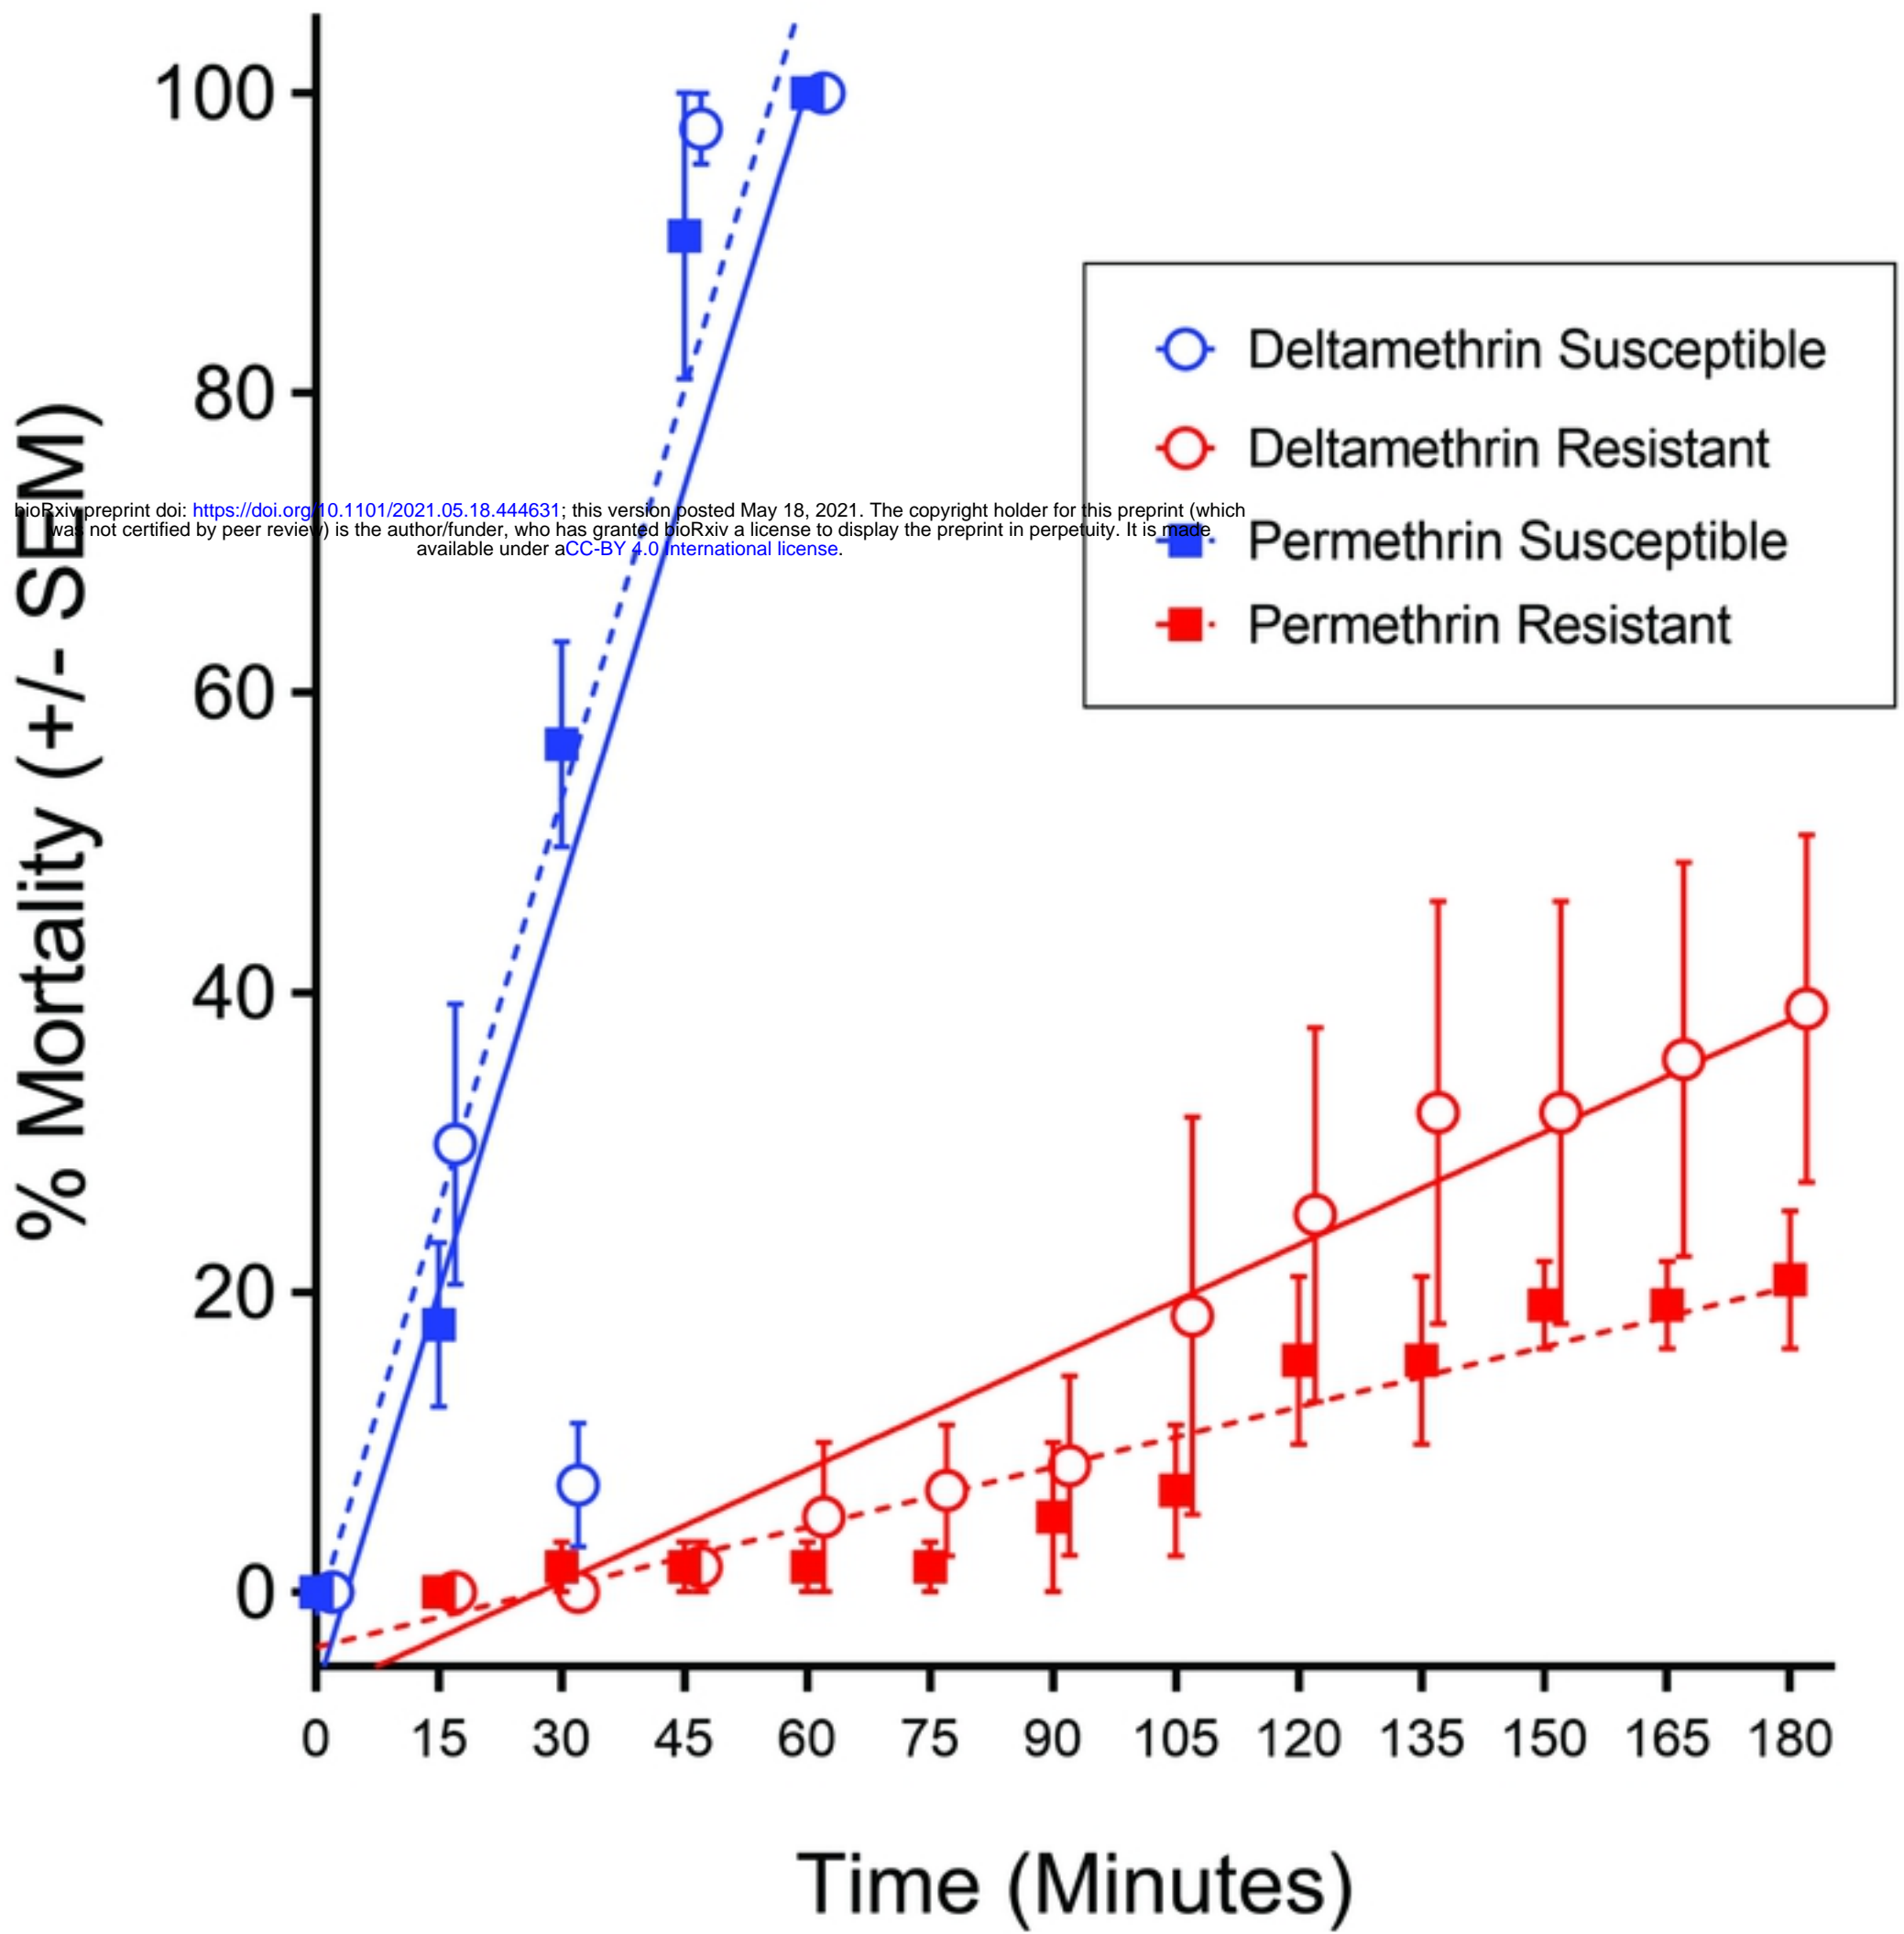

bioRxiv preprint doi: <https://doi.org/10.1101/2021.05.18.444631>; this version posted May 18, 2021. The copyright holder for this preprint (which was not certified by peer review) is the author/funder, who has granted bioRxiv a license to display the preprint in perpetuity. It is made available under aCC-BY 4.0 International license.

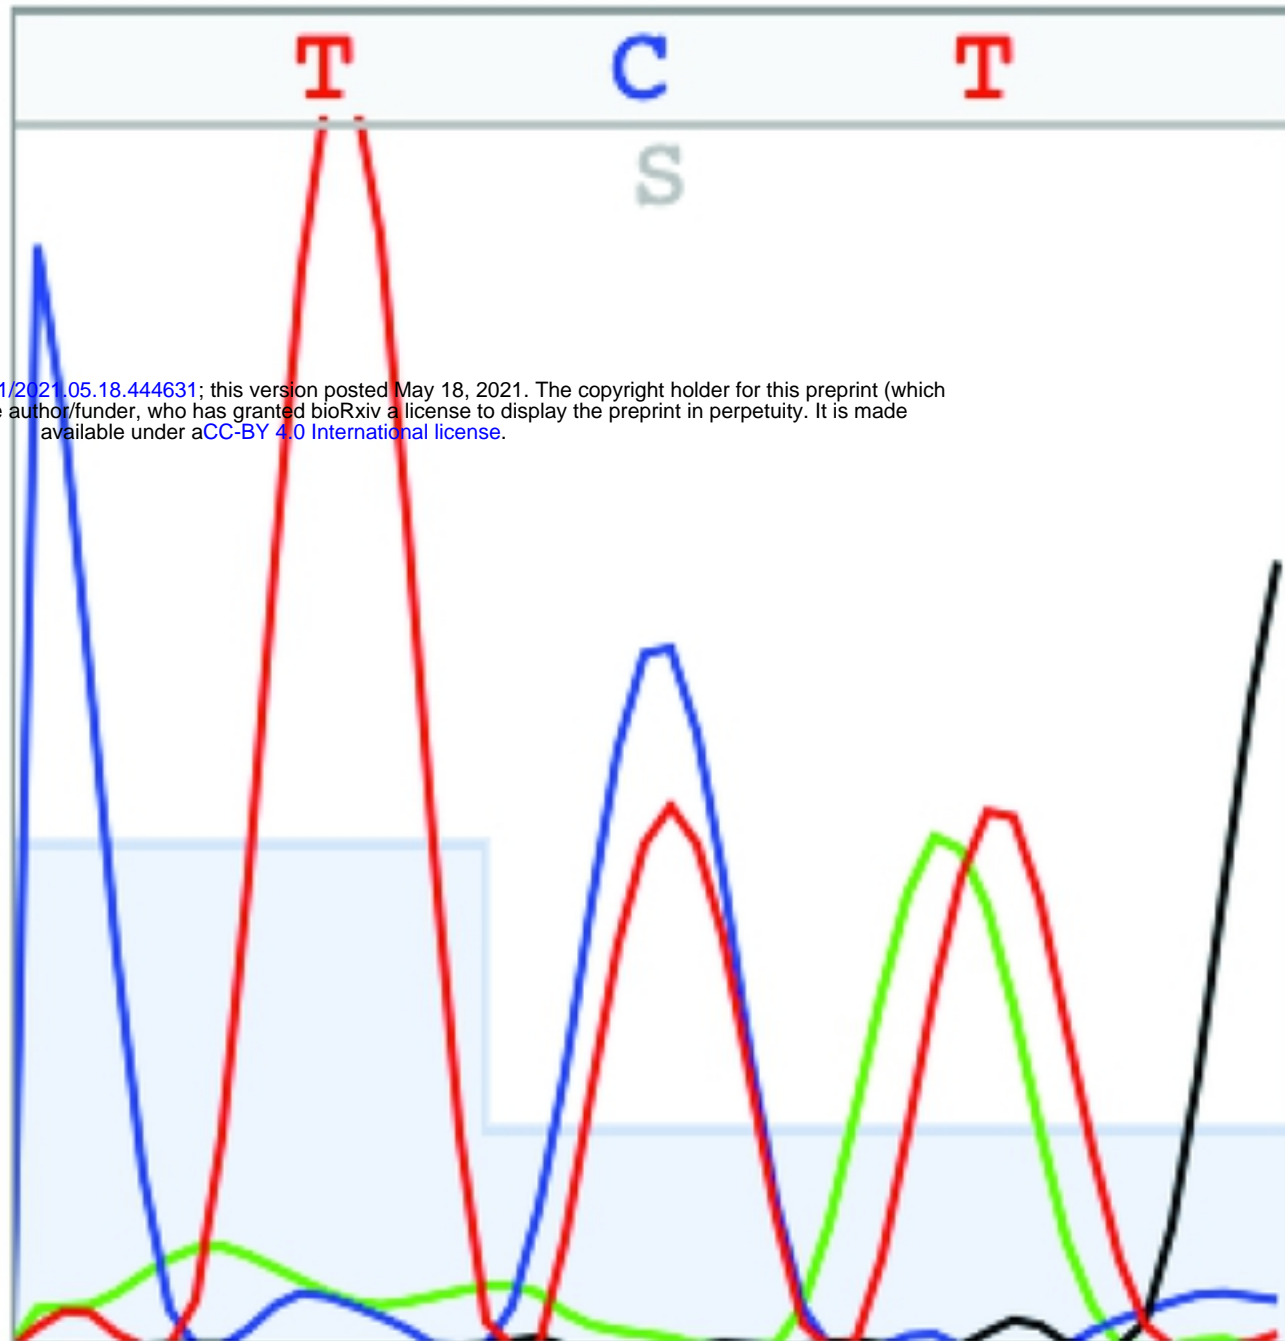



bioRxiv preprint doi: <https://doi.org/10.1101/2021.05.18.444631>; this version posted May 18, 2021. The copyright holder for this preprint (which was not certified by peer review) is the author/funder, who has granted bioRxiv a license to display the preprint in perpetuity. It is made available under aCC-BY 4.0 International license.

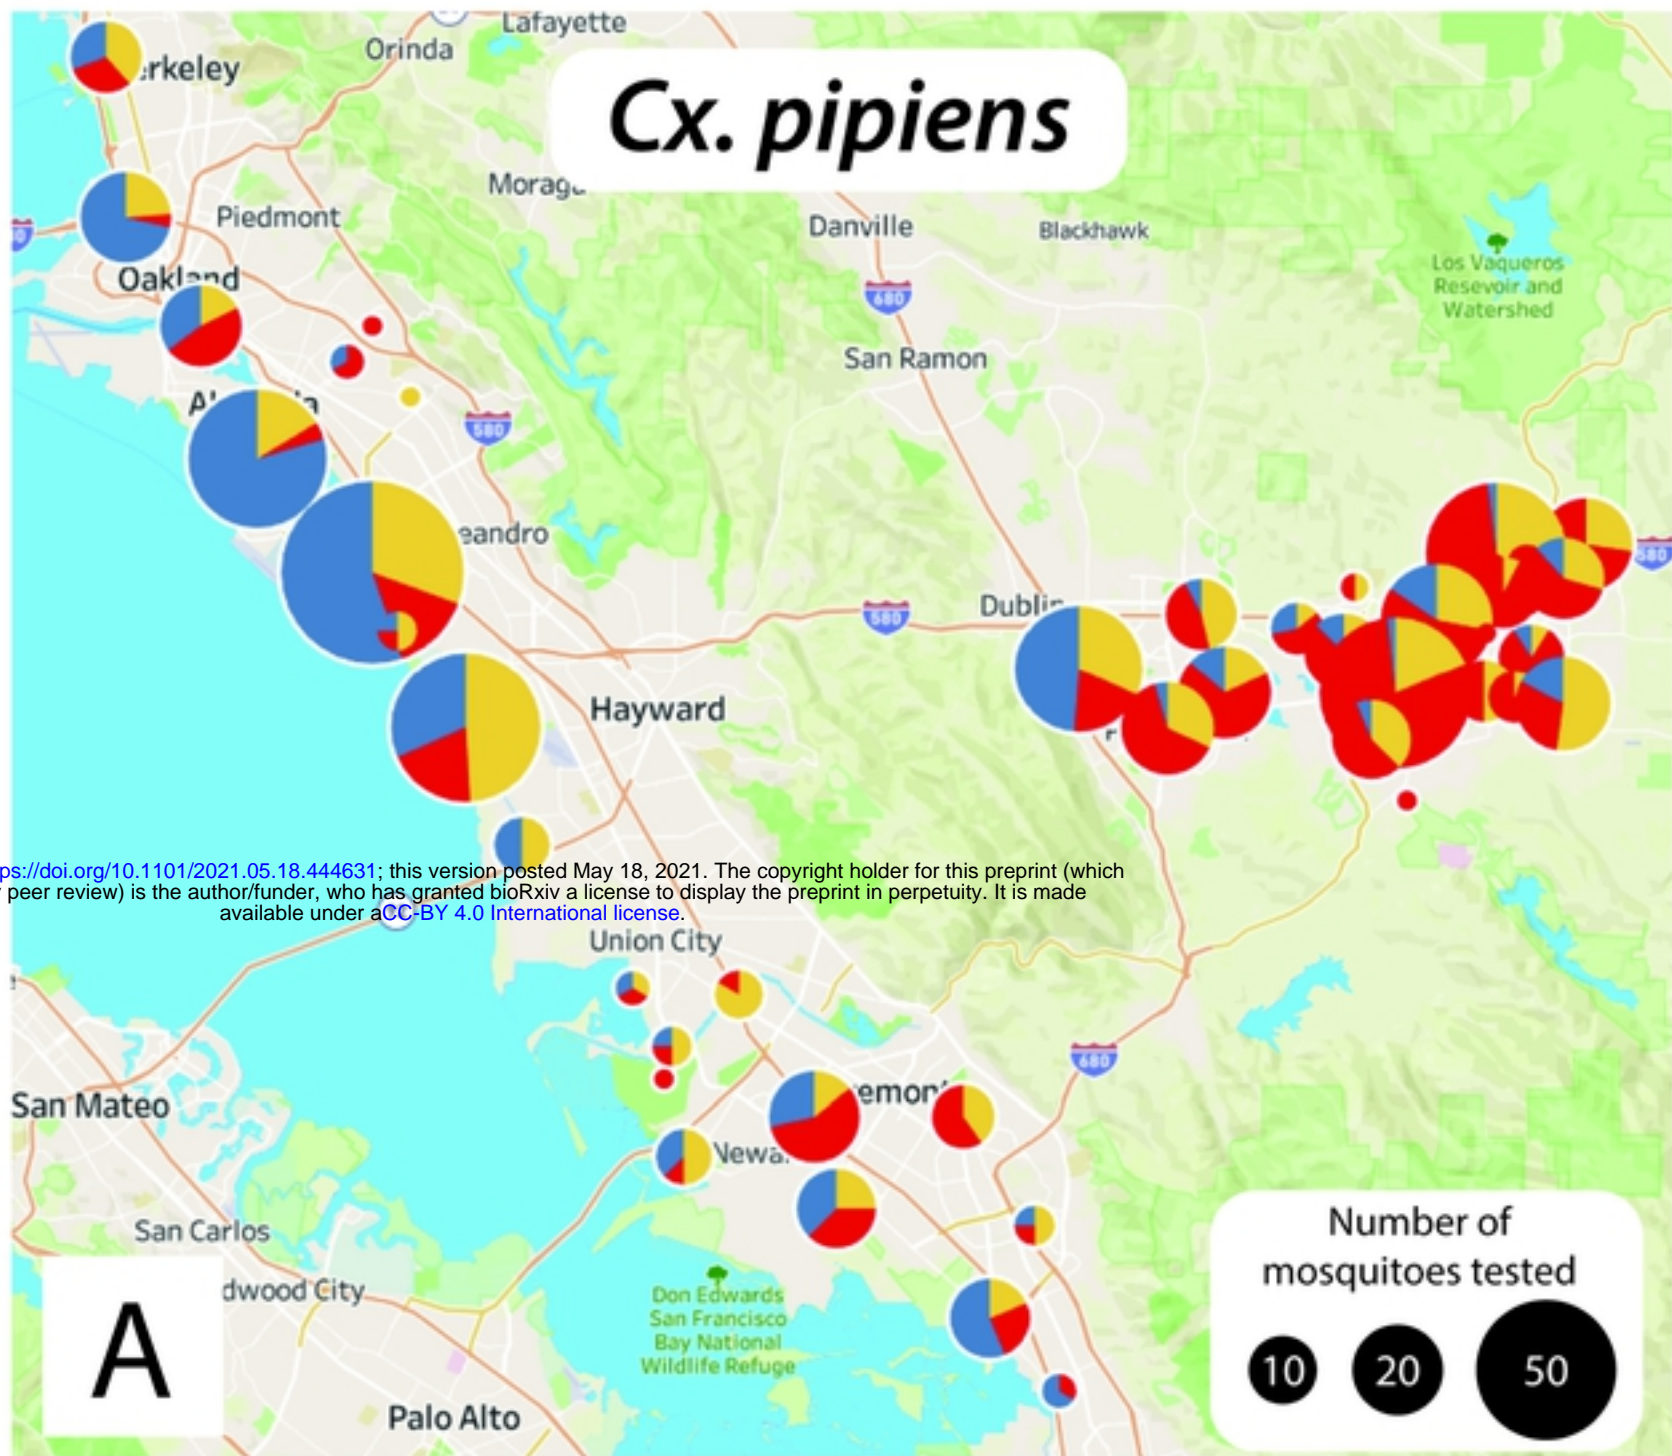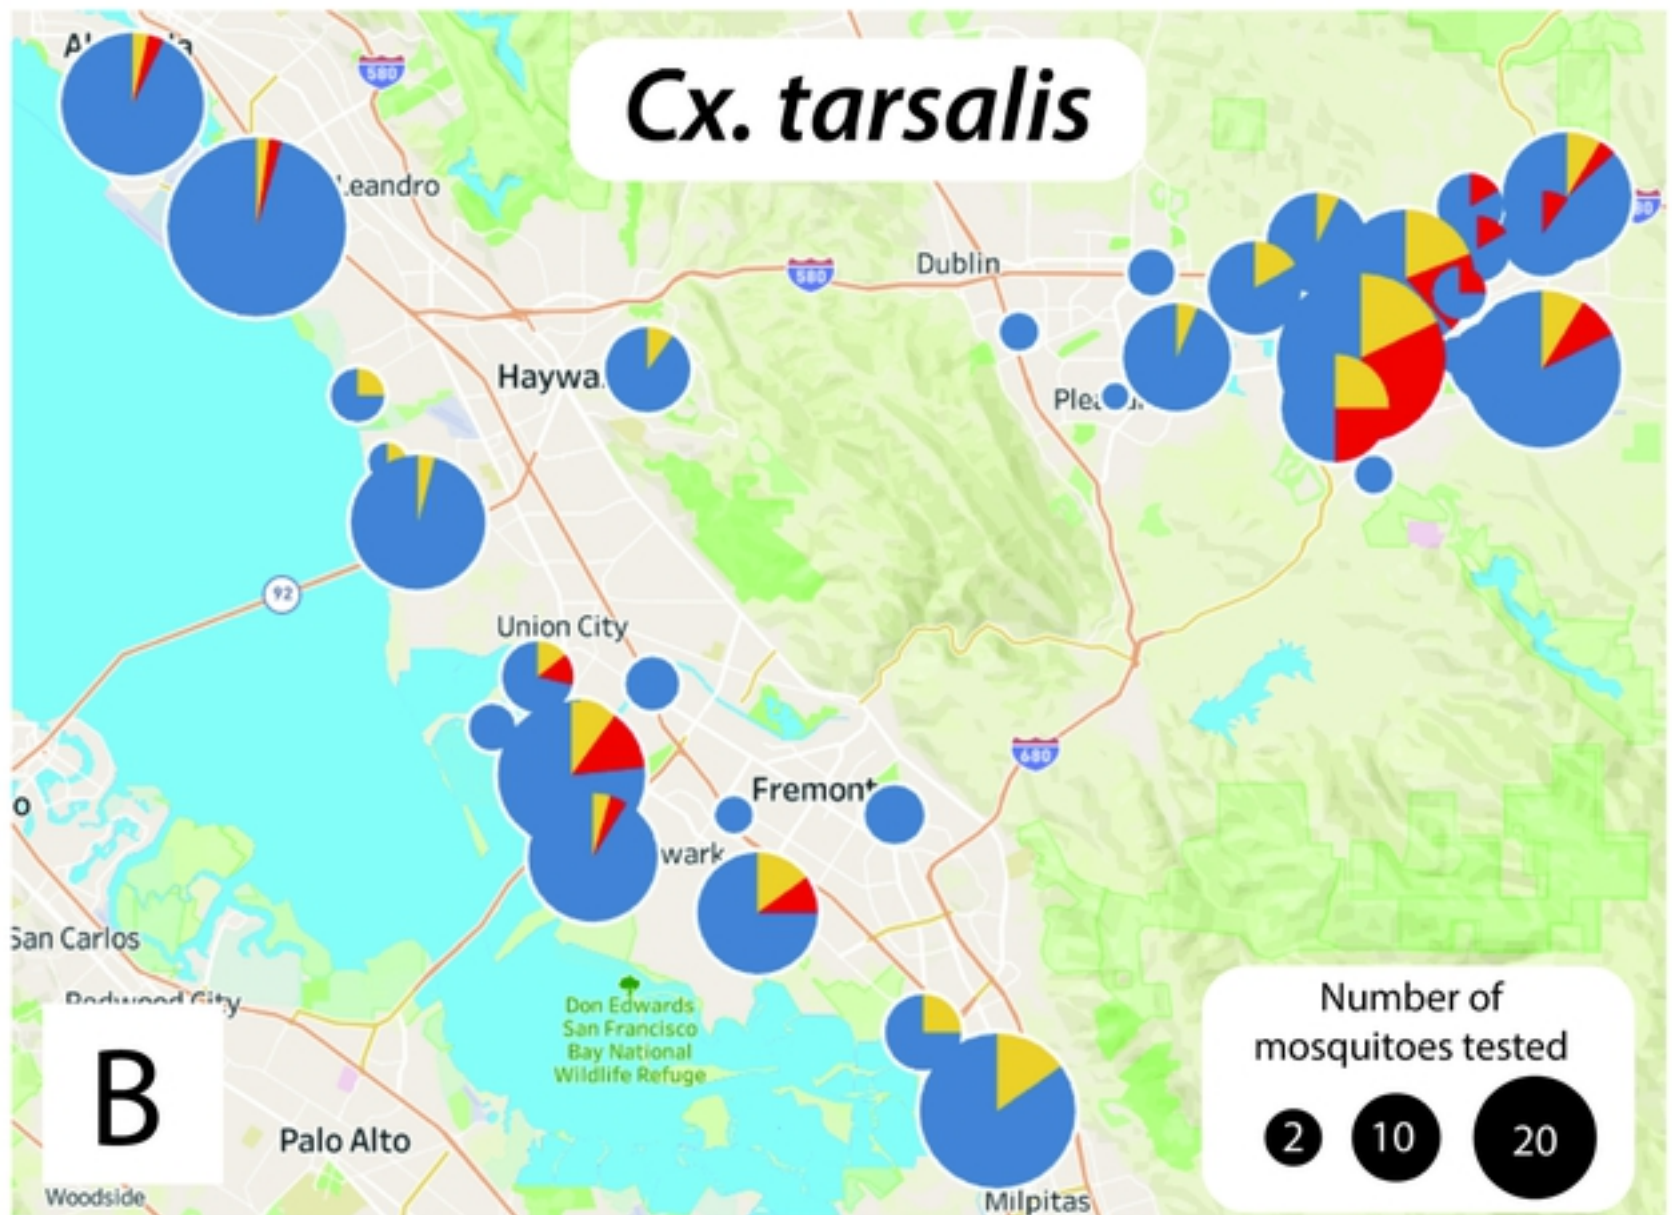

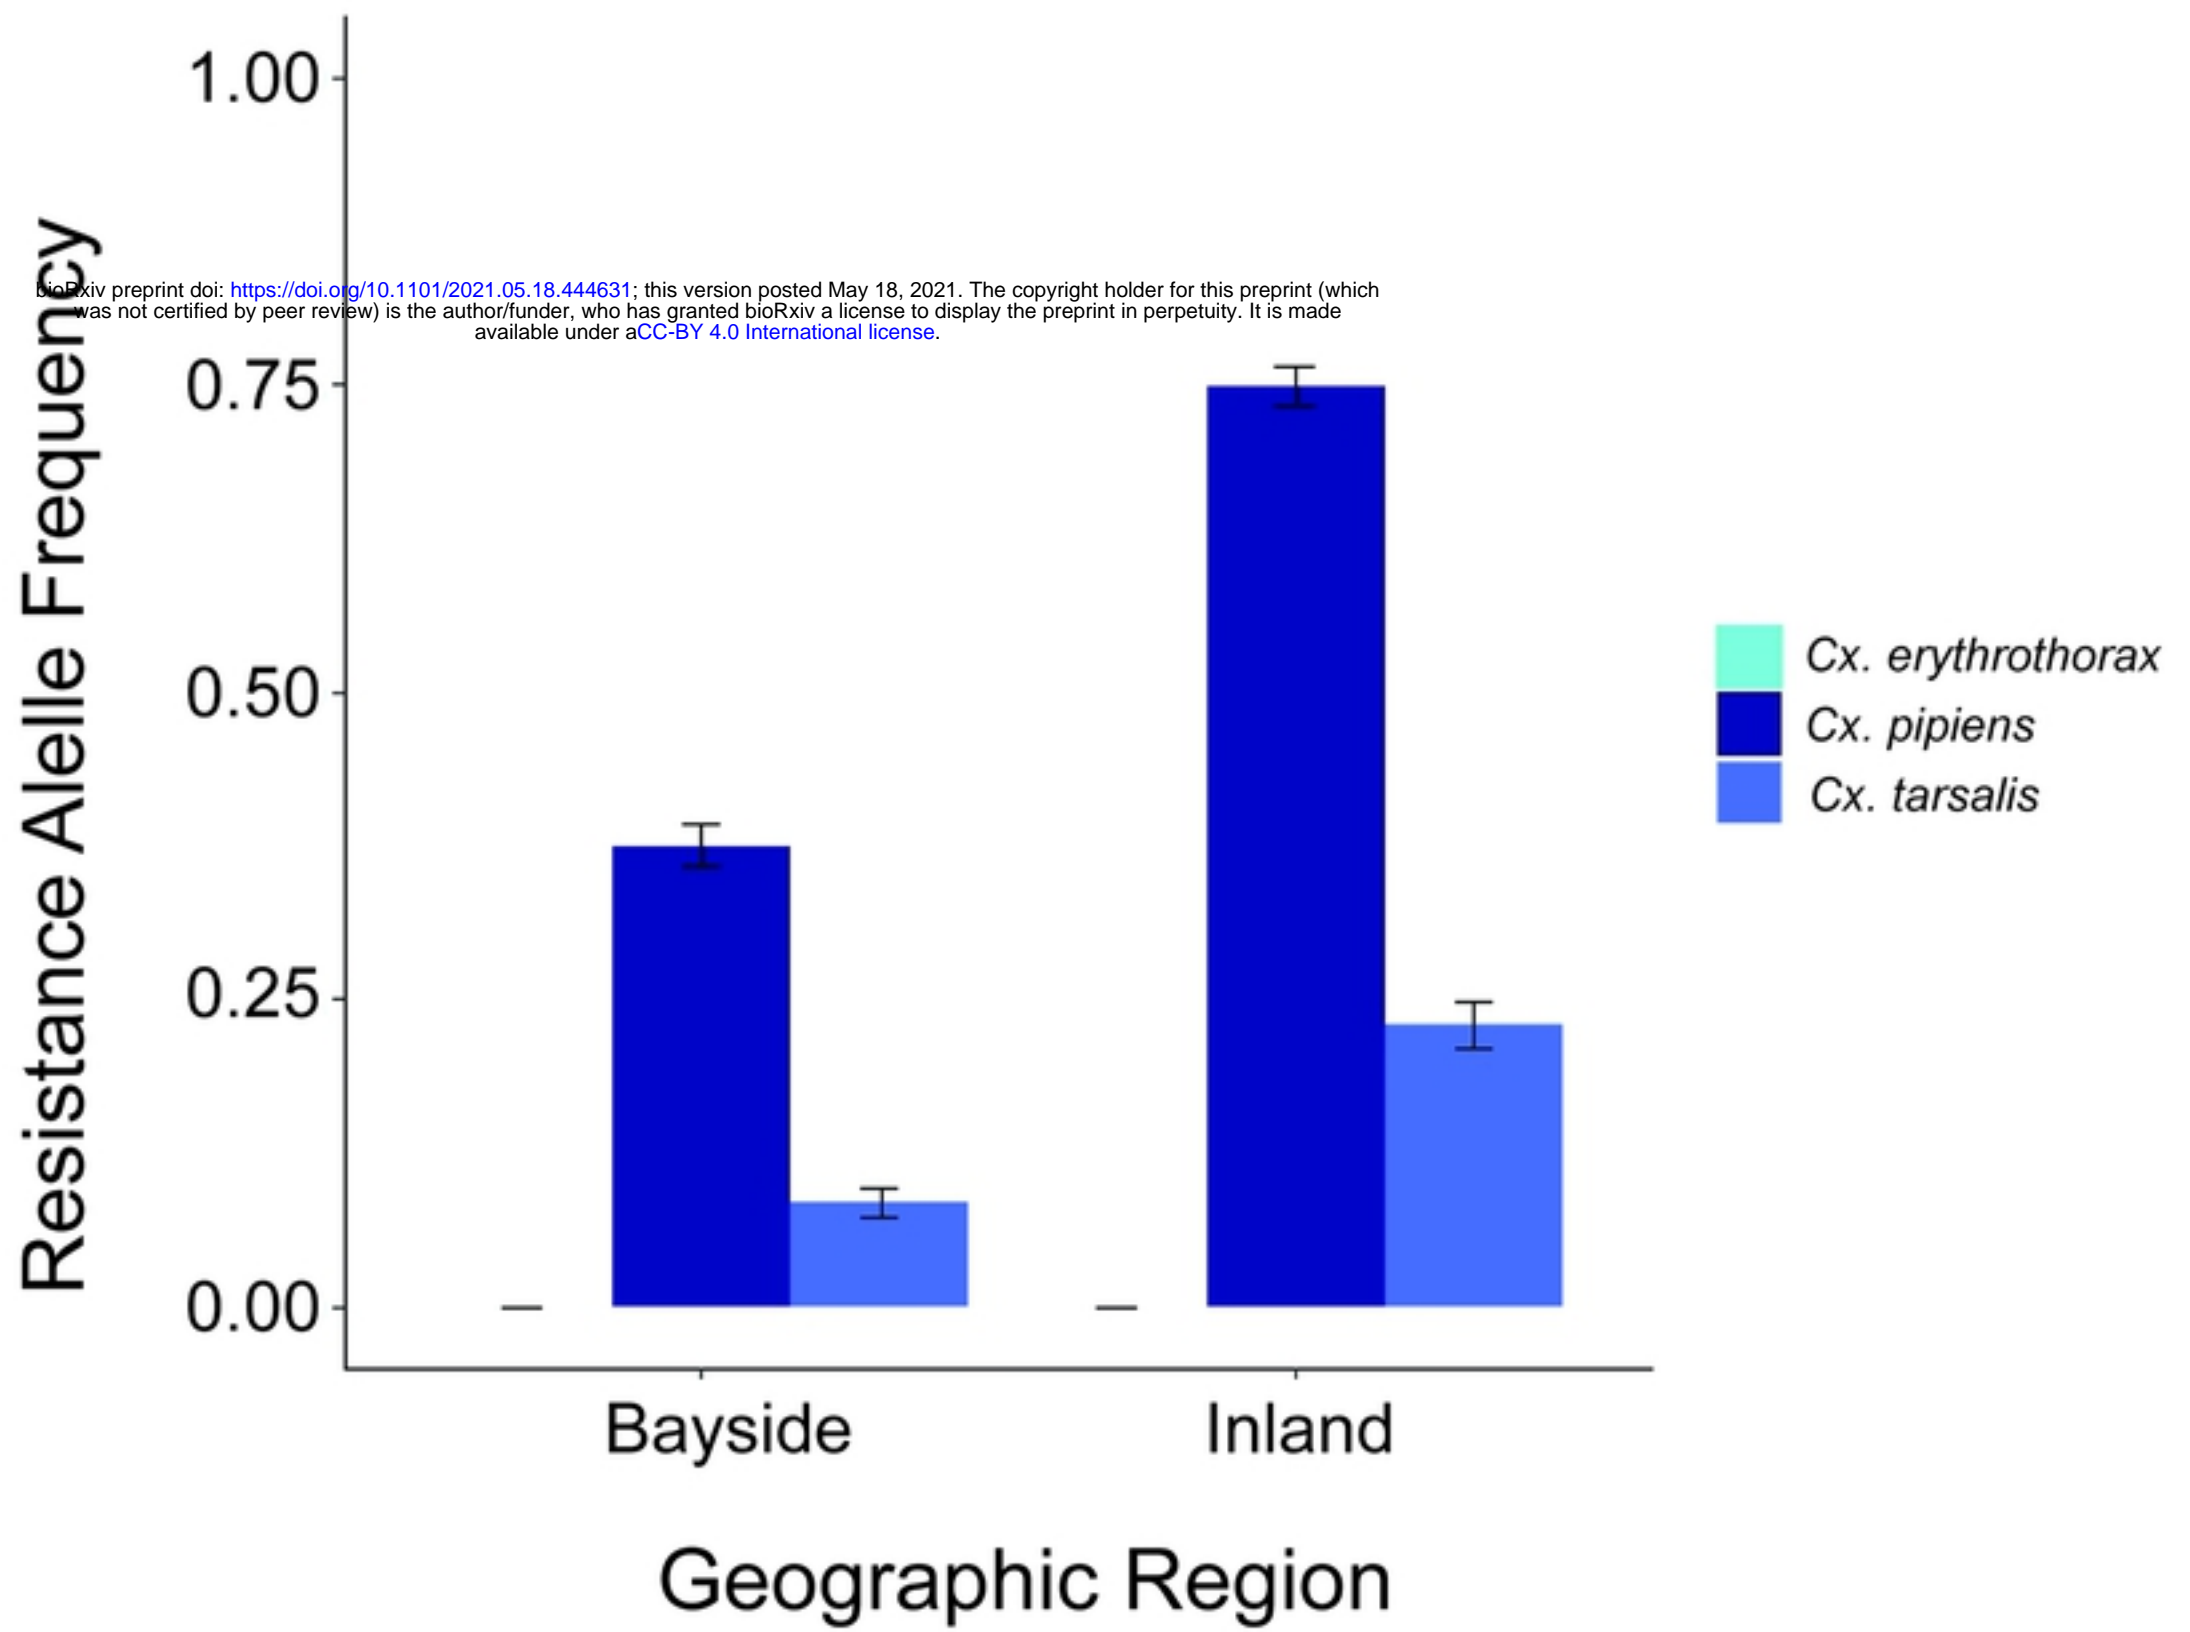

Source: http://biorxiv.org/content/10.1101/2021.05.18.444631v1.full.pdf
